# Supplementary material for: Direct and indirect costs of families with a child with acute lymphoblastic leukaemia in an academic hospital in China: a cross-sectional survey
Source: PubMed Central journal article supplement — BMJ Open. 2019 Jul 18;9(7):e030511. doi: 10.1136/bmjopen-2019-030511 (PMC6661580; doi:10.1136/bmjopen-2019-030511), 2019-07-18
Supplement: bmjopen-2019-030511.draft_revisions.pdf [file bmjopen-2019-030511.draft_revisions.pdf]

# BMJ Open

BMJ Open is committed to open peer review. As part of this commitment we make the peer review history of every article we publish publicly available.

When an article is published we post the peer reviewers' comments and the authors' responses online. We also post the versions of the paper that were used during peer review. These are the versions that the peer review comments apply to.

The versions of the paper that follow are the versions that were submitted during the peer review process. They are not the versions of record or the final published versions. They should not be cited or distributed as the published version of this manuscript.

BMJ Open is an open access journal and the full, final, typeset and author-corrected version of record of the manuscript is available on our site with no access controls, subscription charges or pay-per-view fees (<http://bmjopen.bmj.com>).

If you have any questions on BMJ Open's open peer review process please email [info.bmjopen@bmj.com](mailto:info.bmjopen@bmj.com)

# BMJ Open

## Economic effects of childhood acute lymphoblastic leukemia on families: evidence from China

|                               |                                                                                                                                                                        |
|-------------------------------|------------------------------------------------------------------------------------------------------------------------------------------------------------------------|
| Journal:                      | <i>BMJ Open</i>                                                                                                                                                        |
| Manuscript ID                 | bmjopen-2019-030511                                                                                                                                                    |
| Article Type:                 | Research                                                                                                                                                               |
| Date Submitted by the Author: | 19-Mar-2019                                                                                                                                                            |
| Complete List of Authors:     | Ren, Yijiong; Shanghai Children's Medical Center, School of Medicine, Shanghai Jiao Tong University, China<br>Li, Xin; East China University of Science and Technology |
| Keywords:                     | Economic burden, Child, Acute lymphoblastic leukemia, Family, China                                                                                                    |
|                               |                                                                                                                                                                        |

SCHOLARONE™  
Manuscripts

1  
2  
3  
4 Economic effects of childhood acute lymphoblastic leukemia on families: evidence from  
5  
6 China  
7  
8  
9

10  
11 Yijiong Ren<sup>1†</sup>, PhD; Xin Li<sup>2\*†</sup>, PhD  
12  
13

14 <sup>1</sup>Shanghai Children's Medical Center, School of Medicine, Shanghai Jiao Tong University,  
15  
16 China  
17  
18

19 <sup>2</sup>School of Social and Public Administration, East China University of Science and Technology  
20  
21  
22

23  
24  
25 Address for Correspondence:

26  
27 Xin Li, Ph.D.  
28 Room 111, 130 Meilong Rd  
29 School of Social and Public Administration  
30 East China University of Science and Technology  
31 Shanghai 200237, P. R. China  
32 Tel: 86-21-38762019  
33 Email: xinli@ecust.edu.cn  
34  
35  
36  
37  
38  
39  
40

41 <sup>†</sup>Drs Ren and Li contributed equally to this article.  
42  
43  
44  
45  
46  
47  
48

49 Word count: 3459  
50  
51  
52  
53  
54  
55  
56  
57  
58  
59  
60

1  
2  
3  
4 **Abstract:**  
5

6 **Objectives:** To estimate the economic burden in families of children with acute lymphoblastic  
7 leukemia (ALL) in China.  
8

9  
10  
11 **Design:** A single-site, cross-sectional survey of primary caretakers of patients with childhood  
12 ALL was performed.  
13  
14

15  
16 **Setting and participants:** We analyzed the total cost incurred upon the completion of the first  
17 three-phase treatment (induction, consolidation, and intensification), which require intensive  
18 hospitalization. Eligible patients were: a) diagnosed with ALL between 2010 and 2012 at  
19 Shanghai Children's Medical Center, b) 0-14 years at diagnosis, and c) completed the first three  
20 phases of treatment at SCMC. The data was collected between October 2014 and December  
21 2014.  
22  
23  
24  
25  
26  
27  
28  
29  
30  
31

32 **Outcome measures:** We decomposed the estimate of the total cost into three categories (a)  
33 direct medical cost, which was further divided into outpatient and inpatient costs; (b) direct  
34 non-medical cost, which referred to expenses incurred in relation to the illness; and (c) indirect  
35 cost due to productivity loss.  
36  
37  
38  
39  
40  
41

42 **Results:** Total of 161 patients were included in the study. Among three cost categories, direct  
43 medical cost accounted for about 51.7% of the overall cost, and the rest of 48.3% of the total  
44 cost was attributed to direct non-medical cost and indirect cost. Regarding families with  
45 different household registration type (rural versus urban), the distributions of costs among the  
46 three categories were different. Productivity loss contributed a much higher weight in total cost  
47 for the urban families than for the rural families. In addition, rural families spent most of their  
48 money on the treatment of ALL.  
49  
50  
51  
52  
53  
54  
55  
56  
57  
58  
59  
60

1  
2  
3  
4 **Conclusions:** Families of children with ALL experience a wide range of costs. Ongoing  
5  
6 investigation of families' costs will yield a rich understanding of the disease costs, formulate  
7  
8 the basis of cost assessments, and lend insight into practice and policy changes aimed at  
9  
10 lessening the economic impact of this burden.  
11  
12  
13  
14  
15  
16  
17  
18  
19  
20  
21  
22  
23  
24  
25  
26  
27  
28  
29  
30  
31  
32  
33  
34  
35  
36  
37  
38  
39  
40  
41  
42  
43  
44  
45  
46  
47  
48  
49  
50  
51  
52  
53  
54  
55  
56  
57  
58  
59  
60

For peer review only

### Strengths and limitations of this study

- Research on determining the costs associated with a childhood acute lymphoblastic leukemia is rare and the nature of these costs is poorly understood in developing countries.
- We filled the gap by estimating the economic burden in families with a child with acute lymphoblastic leukemia in China.
- We decomposed the estimate of the total cost into three categories: direct medical cost, direct non-medical cost and indirect cost due to productivity loss.
- Our findings help yield a rich understanding of the disease costs, formulate the basis of cost assessments, and lend insight into practice and policy changes aimed at lessening the economic impact of this burden.
- Majority cost measures were based on parents' self-report and there might exist recall bias for some measures.

**Key words:** Economic burden; Child; Acute lymphoblastic leukemia; Family; China

## Introduction

Acute lymphoblastic leukemia (ALL) is the most common malignant disease among children, accounting for about 25% of all childhood cancers<sup>1</sup>. It not only seriously endangers the physical and mental health of child and their parents, but also imposes enormous financial risks to the family<sup>2-7</sup>. On the one hand, the costs of treatment of ALL and illness-related expenses are immense, on the other hand, parents may have to reduce their work hours, or give up paid work to care for their child resulting in loss of income.

Various studies have been conducted in developed countries to determine the costs associated with a childhood cancer from a family perspective<sup>8</sup>. In these studies, the economic and financial impact of childhood cancer on families was examined across two primary categories: direct costs including the actual monetary expenditures related to the illness such as those associated with transport, food, accommodation, *etc.*<sup>3, 4, 9, 10</sup>, and indirect costs including the value of productivity loss such as cut on work time, take unpaid leave and loss of job<sup>4-7, 11-13</sup>. Although it is hard to make a precise comparison on the magnitudes of financial costs to families due to variations in study design, all studies reported substantial family financial burden due to childhood cancer treatment. Specifically, two Canadian studies found that income loss due to work disruption and out-of-pocket expenses were estimated at over 30% of after-tax family income<sup>2, 6</sup>, and one American study reported that over 50% of the poorest families experienced annual income losses of more than 40%<sup>11</sup>.

While childhood cancer was shown to have huge adverse economic consequences on

1  
2  
3  
4 households in developed countries, it is likely to have even more severe effect on households  
5  
6 in developing countries, which are usually characterized by poorly developed health care  
7  
8 system. In developing countries, such as China, although the government has realized the  
9  
10 importance of reforming the current system, the process is far from perfect. On the one hand,  
11  
12 there are huge differences in the allocation of medical resources between rural and urban areas,  
13  
14 and among different provinces. High quality medical resources are mainly distributed in large  
15  
16 central cities such as Beijing, Shanghai, Guangzhou, *etc.* Therefore, families with seriously ill  
17  
18 child have to go to these cities to receive treatment for better chance of survival. As a result,  
19  
20 the corresponding non-medical out-of-pocket expenses may increase dramatically due to extra  
21  
22 expenditure on transport, accommodation and others. In addition, it is also hard for the parents  
23  
24 of sick child to keep their jobs if they have to leave their places of residence. On the other hand,  
25  
26 the health insurance system in China is segmented, different programs for different population  
27  
28 groups and independently implemented in different provinces, even in cities<sup>14</sup>. As a result,  
29  
30 patients who seek treatment in other cities may not be able to get reimbursement even they have  
31  
32 insurance at their hometowns. Therefore, these families may have to bear most of the medical  
33  
34 cost. As can be seen, under current health care system, the economic burden on the families of  
35  
36 children with ALL could be devastated. Lacking financial aids from various sources may cause  
37  
38 these families to fall from above to below the poverty line, or even give up treatment.  
39  
40  
41  
42  
43  
44  
45  
46  
47  
48  
49  
50  
51  
52

53 However, research on determining the costs associated with a childhood ALL is rare and the  
54  
55 nature of these costs is poorly understood in developing countries<sup>15-18</sup>. It makes policy planning  
56  
57 in the context of essential medicines, national fiscal policy towards childhood ALL and donor  
58  
59  
60

1  
2  
3  
4 policy difficult without any reliable estimates of costs. The purpose of this paper was to fill the  
5  
6 gap by estimating the economic burden in families of children with ALL. Specifically, we  
7  
8 decomposed the estimates of costs into three categories (a) direct medical costs, which was  
9  
10 further divided into outpatient and inpatient costs; (b) direct non-medical costs, which referred  
11  
12 to expenses incurred in relation to the illness; and (c) indirect costs due to productivity loss.  
13  
14  
15  
16  
17  
18

## 19 **Methods**

### 20 *Data and study population*

21  
22 The treatment of childhood ALL usually has four phases: induction, consolidation,  
23  
24 intensification, and maintenance and lasts 2 to 3 years<sup>19</sup>. In the present paper, we estimated total  
25  
26 cost incurred upon the completion of the first three-phase treatment (induction, consolidation,  
27  
28 and intensification), which require intensive hospitalization. Therefore, eligible patients were:  
29  
30 a) diagnosed with ALL between 2010 and 2012 at Shanghai Children's Medical Center  
31  
32 (SCMC), b) 0-14 years at diagnosis, and c) completed the first three phases of treatment at  
33  
34 SCMC. The data was collected between October 2014 and December 2014. The time between  
35  
36 diagnosis and completion of the questionnaire was required to be greater than two years in order  
37  
38 to capture parents' employment experiences throughout the treatment. Since quite a lot of the  
39  
40 families were not living in Shanghai, face-to-face interviews were difficult to conduct. As an  
41  
42 alternative, we conducted telephone interviews on the parents. Only one parent of the child,  
43  
44 who self-identified as the major responsibility for daily care of the child answered the  
45  
46 questionnaire. The interview lasted about 30-45 minutes. We obtained approval from the  
47  
48 Institutional Review Board of Shanghai Children's Medical Center to conduct the study.  
49  
50  
51  
52  
53  
54  
55  
56  
57  
58  
59  
60

### *Pre-testing*

In order to ensure the rationality and accuracy of the questionnaire, we pre-tested the questionnaire with 15 parents of children with ALL who were randomly picked during their follow-up visits to the center. During this period, we revised the questionnaire many times to make sure that parents understood the questions, did not feel uncomfortable, and were aware of their costs reflecting the costs incurred during the induction, consolidation and intensification phases, not the costs associated with the maintenance therapy.

### *Measures*

The questionnaire included three modules. The first module asked questions about socio-demographic characteristics of parents and their child. The second module included direct non-medical cost questions. The last module focused on the indirect cost questions. More specifically, the details of these modules were shown as follows:

Demographic and socio-economic variables: child age at diagnosis, child gender and whether child had health insurance, parent's age at diagnosis, the highest degree of parental education (elementary or lower, high/vocational school or lower, or college and above), family monthly income, family size, household registration type (Hukou types: rural versus urban), place of residence (Shanghai versus other provinces).

Direct non-medical cost variables: direct non-medical costs included expenses related to illness during the period of the first three stages of treatment. Specifically, parent was asked to provide

1  
2  
3  
4 information on: a) expenses on accommodation per month including rent and utility fee; b)  
5  
6 expenses on transportation; c) increased expenses on food and nutritional supplements per  
7  
8 month; d) expenses on hygiene cleaning products and auxiliary treatment equipment, such as  
9  
10 ultraviolet disinfection lamp, air purifier, humidifier, *etc.*; e) expenses on gifts and treats  
11  
12 including electrical devices (e.g. computer, TV, video games *etc.*) and network fee.  
13  
14  
15  
16  
17  
18

19 Indirect cost variables: indirect costs were the costs associated with the lost productivity due to  
20  
21 illness. In the present paper, parent was asked to provide information on employment status at  
22  
23 diagnosis and during the treatment period, changes in role or hours worked since diagnosis and  
24  
25 absence from work. Informants were also asked to complete this section for their partner. The  
26  
27 indirect costs were measured by lost earnings using the human capital approach.  
28  
29  
30  
31  
32  
33  
34

35 Direct medical cost variables: The computerized database of medical costs at SCMC was  
36  
37 established in 1998. The database strictly adheres to medical administration regulations. All  
38  
39 outpatient and hospitalization costs were recorded according to their names/case numbers. In  
40  
41 the present paper, overall outpatient and inpatient costs for each child with ALL between the  
42  
43 confirmation of diagnosis at SCMC and the completion of the intensification therapy were  
44  
45 collected. In addition, the database also contained information on inpatient expenses paid by  
46  
47 insurance for local patients.  
48  
49  
50  
51  
52  
53  
54

### 55 ***Patient and public involvement***

56  
57  
58 No patients were involved in the development of research question, the outcome measures, the  
59  
60

1  
2  
3  
4 design or implementation of the study. There are no plans about dissemination of the results.  
5  
6  
7  
8

### 9 ***Statistical Analysis***

10  
11 All data were reviewed for completeness and relevance. Data were entered into Microsoft Excel  
12 and imported into the STATA 13 statistical package (Stata Corporation, College Station, TX,  
13 USA) for analysis. Descriptive statistics were used to describe the sample characteristics and  
14 to categorize the type and value of cost categories and items. The amounts of all cost categories  
15 were projected to the estimates that incurred during the treatment. Total cost was then computed  
16 as the sum of all cost categories for the sample.  
17  
18  
19  
20  
21  
22  
23  
24  
25  
26  
27  
28  
29

### 30 **Results**

31  
32 Medical expenses and parental contact information of a total of 171 patients were extracted  
33 from SCMC database. We contacted the 171 parents using the telephone numbers provided in  
34 the database and 161 parents gave the consents before we conducted the interview. The 10  
35 failed calls were due to either loss of contact or refuse to participate.  
36  
37  
38  
39  
40  
41  
42  
43  
44

45 Table 1 presents the child, parent, and family characteristics. Mean patient age at diagnosis was  
46 4.9 years (standard deviation (SD) = 3.3 years; range: 0-14 years), the majority were male  
47 (58.4%). Average length of therapy (induction, consolidation, and intensification) was 13.8  
48 months (SD = 9.9 months). In terms of health insurance at the time of diagnosis, 103 children  
49 (63.9%) had at least one type of health insurance, however, 56 (34.8%) had no insurance at all.  
50  
51  
52  
53  
54  
55  
56  
57  
58 The mean age of parents at diagnosis was 32.6 years (SD = 4.28 years), 41.9% of the parents'  
59  
60

1  
2  
3  
4 highest education level was middle school or below, 20% was high/vocational school or below  
5  
6 and 38.1% was college or above. In terms of household characteristics, the average family size  
7  
8 was 4.1 (SD = 1.1), 71 households (44.1%) had rural registration and only 45 households  
9  
10 (28.0%) were local residences (Shanghai). The average household monthly income at diagnosis  
11  
12 was RMB8341.72 (USD1218.04)<sup>1</sup>.  
13  
14  
15  
16  
17  
18

19 Table 2 describes the parents' employment statuses at the time of diagnosis and during the  
20  
21 treatment period. On diagnosis, 35(22%) fathers worked in government, state-owned enterprise  
22  
23 (SOE) or public sector, 109(68.6%) worked in private sector or self-employed, 11(6.9%) were  
24  
25 farmers and 4(2.5%) were unemployed. During the treatment, 47 working fathers managed to  
26  
27 keep their employment status unchanged, 13 completely stopped working, and 97 reported to  
28  
29 take extended absences from work. The average length of absences was 14.4 months (SD =  
30  
31 11.1). Regarding mothers, on diagnosis, 32(20.1%) worked in government, SOE or public  
32  
33 sector, 73(45.9) worked in private sector or self-employed, 16(10.1%) were farmers and  
34  
35 38(23.9%) were unemployed or doing housework. Among those who had a job, 14.8% did not  
36  
37 change their employment status, 6.6% stopped working, and the majority of working mothers  
38  
39 (78.7%) took extended absences from work. The average length of absences was 18.1 months  
40  
41 (SD = 10.8).  
42  
43  
44  
45  
46  
47  
48  
49  
50  
51  
52

53 The costs of direct medical expenses during the treatment are given in Table 3 (Panel A). The  
54  
55 average total medical expenses between diagnosis and completion of the intensification  
56  
57  
58  
59

---

60 <sup>1</sup> The average exchange rate between RMB and USD in 2010 is 6.8485.

1  
2  
3  
4 treatment per person was RMB115768.90 (USD16904.27). Medical expenses were then divided  
5  
6 into two subcategories: outpatient and inpatient costs. The average total expense at clinic per  
7  
8 patient was RMB38506.89 (USD5622.68), and the average total in-hospital expense per patient  
9  
10 was RMB77262.05 (USD11281.60).  
11  
12  
13  
14  
15  
16

17 Panel B of Table 3 presents the costs of direct non-medical expenses incurred during the  
18  
19 treatment for the whole sample and for the urban and rural households separately. Specifically,  
20  
21 the average cost for the whole sample was RMB45896.16 (USD6701.63) with the largest  
22  
23 expenditure on accommodation, followed by those on food and nutritional supplements, on gifts  
24  
25 and treats, on hygiene cleaning products and auxiliary treatment equipment, and the smallest  
26  
27 portion was on transportation. Regarding the expenditures on rural and urban households  
28  
29 respectively, the average direct non-medical cost was RMB50993.63 (USD7445.96) for the  
30  
31 urban sample, whereas the amount was RMB39434.57 (USD5758.13) for the rural counterparts.  
32  
33 The urban households spent the largest proportion of expenses on accommodation (50.0%),  
34  
35 whereas the largest proportion was on food and nutritional supplements (38.5%) for the rural  
36  
37 households.  
38  
39  
40  
41  
42  
43  
44  
45  
46  
47

48 The indirect cost incurred during the treatment is shown in Panel C of Table 3. The average  
49  
50 productivity loss due to a childhood ALL for the whole sample was RMB62403.41  
51  
52 (USD9111.98). In addition, we found that the urban households incurred much higher  
53  
54 productivity loss than the rural households (RMB88457.34 versus RMB29377.31 or  
55  
56 USD12916.31 versus USD4289.60).  
57  
58  
59  
60

1  
2  
3  
4  
5  
6 Table 4 summarizes the total cost incurred during the treatment and the proportion of each  
7 component. On average, the total cost for the whole sample was RMB224068.47  
8 (USD32717.89). The direct medical cost accounted for more than half of the total cost (51.7%),  
9 followed by the indirect cost (27.9%) and direct non-medical cost (20.5%). For the urban  
10 households, direct medical cost contributed 46.5% of total costs, whereas the number became  
11 61.3% for the rural households. In addition, the indirect cost for the urban households accounted  
12 for 33.9% of total cost, however, it only made up 16.5% of total cost for the rural households.  
13  
14  
15  
16  
17  
18  
19  
20  
21  
22  
23  
24  
25  
26

## 27 Discussion

28  
29 A cancer diagnosis in childhood can substantially affect the physical, psychosocial, and  
30 socioeconomic well-being of patients and their families. Yet, research on determining the costs  
31 associated with a childhood ALL is rare and the nature of these costs is poorly understood,  
32 especially in developing countries. The present study provides a breakdown of families' costs  
33 and resource use and an in-depth understanding of families' financial burden. We found that  
34 the financial burden faced by the Chinese families of children with ALL was tremendous.  
35 Among three cost categories, direct medical cost accounted for about 51.7% of the overall cost,  
36 and the rest of 48.3% of the total cost was attributed to direct non-medical cost and indirect  
37 cost. Regarding families with different household registration type (rural versus urban), the  
38 distributions of costs among the three categories were different. Productivity loss contributed a  
39 much higher weight in total cost for the urban families than for the rural families. In addition,  
40 rural families spent most of their money on the treatment of ALL.  
41  
42  
43  
44  
45  
46  
47  
48  
49  
50  
51  
52  
53  
54  
55  
56  
57  
58  
59  
60

1  
2  
3  
4  
5  
6  
7 Unlike most of developed countries where cost of treatment is borne mainly by the public sector  
8  
9 and by health insurance<sup>4, 13</sup>, patients in developing countries have to bear a big portion of direct  
10  
11 medical cost<sup>16, 17</sup>. Shanghai is one of the most economically developed regions in China, and  
12  
13 has relatively well developed health insurance system and the most generous reimbursement  
14  
15 system compared to other provinces of China. However, based on the insurance reimbursement  
16  
17 data extracted from the SCMC database, the reimbursement rate for hospitalization expenses  
18  
19 was just 49.8%. For those who were not eligible for the local health insurance policy (79.5% of  
20  
21 the total sample), they had to fund the treatment on their own and tried to get the reimbursement  
22  
23 at their hometown later. According to the health insurance regulations of China, if the patients  
24  
25 choose to receive treatment in other provinces or cities, or in non-designated hospitals, the  
26  
27 reimbursement rate could be very low or none at all. Although we were unable to determine  
28  
29 this from our study directly, one report did have shown that the actual reimbursement rate is  
30  
31 less than 50% for most of the rural families of children with leukemia, of which around 27% of  
32  
33 children can only get 30% of reimbursement<sup>19</sup>. In addition, in the questionnaire we asked the  
34  
35 parents “any comments or suggestions on current insurance reimbursement policy”, more than  
36  
37 half of the non-local parents (57.8%) mentioned that reimbursement rate was too low.  
38  
39 Specifically, the low reimbursement was mainly due to the following reasons: there existed a  
40  
41 big gap on reimbursement rate between local and non-local residents; outpatient and imported  
42  
43 medicines were not covered by the insurance; and the reimbursement procedure across  
44  
45 provinces was tedious and time consuming, and the actual reimbursement rate was low, so some  
46  
47 parents chose to forgo reimbursement.  
48  
49  
50  
51  
52  
53  
54  
55  
56  
57  
58  
59  
60

1  
2  
3  
4  
5  
6 In addition to direct medical cost, direct non-medical cost accounted for 20.5% of the total cost.  
7  
8  
9 Around 45% of the total direct non-medical expenses were spent on accommodation. Although  
10  
11 the very poor families can receive 30 days of accommodation at the center at very low price<sup>15</sup>,  
12  
13 the space is limited and the 30-day rental period is far from enough. Most non-local families  
14  
15 had to rent a room or an apartment near the hospital for about RMB1000-RMB5000  
16  
17 (USD146.02-USD730.09) per month for average 12 months. Food and nutritional supplements  
18  
19 accounted for about 35% of the total direct non-medical cost. As described by Tsimicalis et al.,  
20  
21 increased expenses on food were to accommodate the child's fluctuating weight, satisfy food  
22  
23 cravings, taste alterations, *etc.*<sup>10</sup>. In contrast to the previous literature which found that transport  
24  
25 took a significant portion of family financial cost<sup>9, 10, 20</sup>, we found that transport only contributed  
26  
27 to 2.7% of the total direct non-medical cost. That was because most of non-local families chose  
28  
29 to rent near the hospital, which saved travel cost. Although the local families needed to travel  
30  
31 "back and forth" constantly from home to the hospital, the amount was much less than those on  
32  
33 accommodation and food.  
34  
35  
36  
37  
38  
39  
40  
41  
42  
43  
44

45 Following diagnosis, 85% of working mothers and 70% of working fathers gave up all paid  
46  
47 employment or took unpaid extended leaves in our sample. These numbers were much higher  
48  
49 than those reported in the previous studies<sup>4, 6, 12, 13</sup>. The possible explanation was that in our  
50  
51 sample, the majority families were from other provinces (72%), and it was hard for only one  
52  
53 parent to handle all the issues related to treatment, accommodation, food, *etc.*, therefore, both  
54  
55 parents had to quit their jobs or took unpaid leaves during the treatment. In addition, although  
56  
57  
58  
59  
60

1  
2  
3  
4 indirect cost only accounted for about 28% of the total cost, the patient families might  
5  
6 experience long-term negative effects of the illness on their financial situation. Specifically,  
7  
8 consistent with previous literature<sup>3, 21</sup>, most of the families in our sample (59%) had to borrow  
9  
10 during the treatment. In addition, Wakefeild *et al.* (2014) found that it was quite challenge for  
11  
12 parents to return to work after their child's cancer treatment due to familial, psychological and  
13  
14 practical factors<sup>22</sup>. As a result, the two factors may make the affected families more difficult to  
15  
16 recover from economic hardship.  
17  
18  
19  
20  
21  
22

23  
24 Our data indicated that the families with high socio-economic status were more likely to receive  
25  
26 treatment in high quality medical facilities. Specifically, according to data from National  
27  
28 Bureau of Statistics of China, in 2010, the annual urban per capita income was RMB19109.4,  
29  
30 and the amount was RMB5919.0 in the rural areas<sup>23</sup>. However, our data indicated that the  
31  
32 sample urban per capita income was 1.7 times that of the national urban average and the ratio  
33  
34 became 2.7 times for the rural per capita income. In addition, our data showed that the total cost  
35  
36 was 2.12 times of the sample urban family's annual income, and was 2.49 times of the sample  
37  
38 rural family's annual income. This finding indicated that even for these high socio-economic  
39  
40 families, the economic burden of child ALL was huge, especially for the rural families.  
41  
42  
43  
44  
45  
46  
47  
48  
49

50 Our findings have very important policy implications. First, policy makers should make effort  
51  
52 on simplifying the reimbursement procedure across provinces and eliminating the huge  
53  
54 disparities in reimbursement ratio across regions; second, our sample indicated 35% of patients  
55  
56 did not have any insurance at diagnosis, although we did not have direct data on why these  
57  
58  
59  
60

1  
2  
3  
4 parents chose not to purchase insurance for their child, previous study has shown that lack of  
5  
6 knowledge or the concept of insurance could be a major barrier for people from participating  
7  
8 the insurance program<sup>24</sup>, therefore, the government should work hard on educating people  
9  
10 regarding the different programs; third, patients with cancer and their families may need  
11  
12 ongoing financial management with a designated financial advisor well beyond the initial  
13  
14 treatment phase to help them manage debt, access resources to cope with direct and indirect  
15  
16 costs of cancer treatment and maintain patients' and families' financial capacity later in life.  
17  
18  
19  
20  
21  
22  
23

24 There are limitations in this study. First, majority measures were based on parents' self-report,  
25  
26 and there may exist recall bias for some measures. However, to minimize recall bias, before  
27  
28 conducting formal interview, we contacted them one week in advance and asked parents to  
29  
30 recall and list out the details of all the expenses during the treatment. After the interview, we  
31  
32 double checked data. If there was inconsistency in the data, we called back to clarify. Second,  
33  
34 while the generalizability of this study may be somewhat limited as we focused on one hospital,  
35  
36 SCMC, as one of the primary pediatric tertiary care centers in China, it provides treatment of  
37  
38 severe disease in children around China (Our data showed that 72% of patients were non-local  
39  
40 residents). Therefore, our results are likely applicable to other geographic areas. Third, our  
41  
42 sample included the families who were relatively rich compare with national average, which  
43  
44 limited our ability to assess the financial impact among the families with low socio-economic  
45  
46 status.  
47  
48  
49  
50  
51  
52  
53  
54  
55  
56  
57

58 Families of children with ALL experience a wide range of costs. Ongoing investigation of  
59  
60

1  
2  
3  
4 families' costs will yield a rich understanding of the disease costs, formulate the basis of cost  
5  
6 assessments, and lend insight into practice and policy changes aimed at lessening the economic  
7  
8  
9 impact of this burden.  
10  
11  
12  
13  
14  
15  
16  
17  
18  
19  
20  
21  
22  
23  
24  
25  
26  
27  
28  
29  
30  
31  
32  
33  
34  
35  
36  
37  
38  
39  
40  
41  
42  
43  
44  
45  
46  
47  
48  
49  
50  
51  
52  
53  
54  
55  
56  
57  
58  
59  
60

For peer review only

### **Contribution Statement**

YR and XL designed the study, developed data analysis plan and equally contributed to this study. XL performed statistical analysis of the data. All authors made significant contributions to the interpretation of results and participated in drafting and revising the manuscript. All authors have approved the final version.

### **Competing Interests**

None.

### **Ethics approval**

This study was approved by the Institutional Review Board of Shanghai Children's Medical Center.

### **Funding**

This work was supported by the Fundamental Research Funds for the Central Universities of China (Grant No. 17JCYA03).

### **Data Sharing Statement**

No additional data are available.

## References

1. Ross JA, Olshan AF. Pediatric Cancer in the United States: the Children's Oncology Group Epidemiology Research Program. *Cancer Epidemiology, Biomarkers & Prevention*, 2004; 310: 1552-1554.
2. Barr, R, Furlong W, Horsman J, etc. The monetary costs of children cancer to the families of patients. *International Journal of Oncology*, 1996; 8: 933-940.
3. Dockerty JD, Skegg DC, Williams SM. Economic effects of childhood cancer on families. *Journal of Pediatrics and Child Health*, 2003; 39:254-258.
4. Eiser C, Upton P. Costs of Caring for a Child with Cancer: A Questionnaire Survey. *Child: Health and Development*, 2007; 33(4): 455-459.
5. Dussel V, Bona K, Heath JA, etc. Unmeasured costs of a child's death: Perceive financial burden, work disruptions, and economic coping strategies used by American and Australian families who lost children to cancer. *Journal of Clinical Oncology*, 2011; 29:1007-1013.
6. Tsimicalis A, Stevens B, Ungar WJ, etc. A prospective study to determine the costs incurred by families of children newly diagnosed with cancer in Ontario. *Psychooncology* 2012; 21:1113-1123.
7. Warner EL, Kirchhoff AC, Nam GE, et al. Financial Burden of Pediatric Cancer for Patients and Their Families. *Journal of Oncology Practice*, 2015; 11: 12-18.
8. Pelletier W, Bona K. Assessment of Financial Burden as a Standard of Care in Pediatric Oncology. *Pediatric Blood and Cancer*, 2015; 62: S619-S631.
9. Cohn RJ, Goodenough B, Foreman T, Suneson J. Hidden financial costs in treatment for

- 1  
2  
3  
4 childhood cancer: An Australian study of lifestyle implications for families absorbing out-  
5 of-pocket expenses. *Journal of Pediatric Hematology/Oncology*, 2003; 25:854-863.  
6  
7  
8  
9 10. Tsimicalis A, Stevens B, Ungar W, et al. A Mixed Method Approach to Describe the Out-  
10 of-Pocket Expenses Incurred by Families of Children with Cancer. *Pediatric Blood and*  
11 *Cancer*, 2013; 60: 438-445.  
12  
13  
14  
15  
16 11. Bona K, Dussel V, Orellana L, etc. Economic impact of advanced pediatric cancer on  
17 families. *Journal of Pain and Symptom Management*, 2014; 47:594-603.  
18  
19  
20  
21  
22 12. Fluchel MN, Kirchoff AC, Bodson J, etc. Feograph and the burden of care in pediatric  
23 cancers. *Pediatric Blood and Cancer*, 2014; 61:1918-1924.  
24  
25  
26  
27 13. Limburg H, Shaw Ak, McBride ML. Impact of childhood cancer on parental employment  
28 and sources of income: a Canadian pilot study. *Pediatric Blood and Cancer*, 2008; 51:93-  
29 98.  
30  
31  
32  
33  
34  
35 14. Jin Y, Hou Z, Zhang D. Determinants of Health Insurance Coverage among People Aged  
36 45 and over in China: Who Buys Public, Private and Multiple Insurance. *PLOS ONE*, 2016:  
37 11: e161774.  
38  
39  
40  
41  
42  
43 15. Liu Y, Chen J, Tang JY, et al. Cost of Childhood Acute Lymphoblastic Leukemia Care in  
44 Shanghai, China. *Pediatric Blood and Cancer*, 2009; 53: 557-562.  
45  
46  
47  
48 16. Islam A, Akhter A, Eden T. Cost of Treatment for Children with Acute Lymphoblastic  
49 Leukemia in Bangladesh. *Journal of Cancer Policy*, 2015; 6: 37-43.  
50  
51  
52  
53 17. Ghatak N, Trehan A, Bansal D. Financial Burden of Therapy in Families with a Child with  
54 Acute Lymphoblastic Leukemia: Report from North India. *Supportive Care in Cancer*,  
55 2016; 24: 103-108.  
56  
57  
58  
59  
60

- 1  
2  
3  
4 18. Wang J, Shen N, Zhang X, et al. Care Burden and its Predictive Factors in Parents of Newly  
5  
6 Diagnosed Children with Acute Lymphoblastic Leukemia in Academic Hospitals in China.  
7  
8 Supportive Care in Cancer, 2017; 25: 3703-3713.  
9  
10
- 11 19. Red Cross Report. A report on the living conditions of children diagnosed with leukemia  
12  
13 in rural China. 2013 (in Chinese). Available at:  
14  
15 <https://wenku.baidu.com/view/7004a99b4afe04a1b071dec5.html>.  
16  
17
- 18 20. Seibel N. Treatment of acute lymphoblastic leukemia in children and adolescents: Peaks  
19  
20 and pitfalls. Hematology, 2008; 1:374-380.  
21  
22
- 23 21. Miedema B, Easley J, Fortin P, et al. The economic impact on families when a child is  
24  
25 diagnosed with cancer. Current Oncology, 2008; 15:93-98.  
26  
27
- 28 22. Wakefield CE, McLoone JK, Evans NT, Ellis SJ, Cohn RJ. It's more than dollars and cents:  
29  
30 the impact of childhood cancer on parents' occupational and financial health. Journal of  
31  
32 Psychosocial Oncology, 2014; 32:602-621.  
33  
34
- 35 23. National Bureau of Statistics of China. 2011. Data available at:  
36  
37 <http://www.stats.gov.cn/tjsj/ndsj/2011/indexch.htm>.  
38  
39
- 40 24. Li, X and Zhang, W. The impacts of health insurance on health care utilization among the  
41  
42 elderly in China. Social Science & Medicine, 2013; 85:59-65.  
43  
44  
45  
46  
47  
48  
49  
50  
51  
52  
53  
54  
55  
56  
57  
58  
59  
60

Table 1. Child, parent, and family characteristics (n=161)

| Characteristics                                      | N       | %          |
|------------------------------------------------------|---------|------------|
| <b><i>Child characteristics</i></b>                  |         |            |
| Age at diagnosis, years (mean, SD)                   | 4.9     | (3.3)      |
| Average treatment period, months (mean, SD)          | 13.8    | (9.9)      |
| Gender                                               |         |            |
| Male                                                 | 94      | 58.4       |
| Female                                               | 67      | 41.6       |
| No Health insurance                                  | 56      | 34.8       |
| <b><i>Parent characteristics</i></b>                 |         |            |
| Age at diagnosis, years (mean, SD)                   | 32.6    | (4.28)     |
| Education (the highest degree of parental education) |         |            |
| Middle school or lower                               | 67      | 41.9       |
| High/vocational school                               | 32      | 20.0       |
| College or above                                     | 61      | 38.1       |
| <b><i>Household characteristics</i></b>              |         |            |
| Family size (mean, SD)                               | 4.1     | (1.1)      |
| Household monthly income, RMB (mean, SD)             | 8341.72 | (11942.80) |
| Hukou (Registered residence type)                    |         |            |
| Rural                                                | 71      | 44.1       |
| Urban                                                | 90      | 56.0       |
| Area of residence                                    |         |            |
| Shanghai                                             | 45      | 28.0       |
| Other provinces                                      | 116     | 72.0       |

Table 2. Employment status of parents

| Characteristics                                                                      | N      | %    | N      | %    |
|--------------------------------------------------------------------------------------|--------|------|--------|------|
| <b><i>Employment at diagnosis</i></b>                                                | Father |      | Mother |      |
| Government, SOE, or Public sector                                                    | 35     | 22.0 | 32     | 20.1 |
| Private sector or self-employed                                                      | 109    | 68.6 | 73     | 45.9 |
| Agriculture                                                                          | 11     | 6.9  | 16     | 10.1 |
| Unemployed or doing housework                                                        | 4      | 2.5  | 38     | 23.9 |
| <b><i>Change of employment status<br/>(conditional on employed at diagnosis)</i></b> | Father |      | Mother |      |
| No change                                                                            | 47     | 29.9 | 18     | 14.8 |
| Completely stop working                                                              | 13     | 8.3  | 8      | 6.6  |
| Extended leave                                                                       | 97     | 61.7 | 96     | 78.7 |
| Average length of absence, months<br>(mean, SD)                                      | 14.4   | 11.1 | 18.1   | 10.8 |

1  
2  
3  
4  
5  
6  
7  
8  
9  
10  
11  
12  
13  
14  
15  
16  
17  
18  
19  
20  
21  
22  
23  
24  
25  
26  
27  
28  
29  
30  
31  
32  
33  
34  
35  
36  
37  
38  
39  
40  
41  
42  
43  
44  
45  
46

Table 3. Costs of different categories during the treatment

|                                                             | Total sample (n = 161) |           |      | Urban sample (n =90) |           |      | Rural sample (n = 71) |          |      |
|-------------------------------------------------------------|------------------------|-----------|------|----------------------|-----------|------|-----------------------|----------|------|
|                                                             | Mean(RMB)              | SD        | %    | Mean(RMB)            | SD        | %    | Mean(RMB)             | SD       | %    |
| <b>Panel A: Total direct medical costs</b>                  | 115768.90              | 102733.40 |      | 121232.00            | 126696.70 |      | 108843.90             | 60230.74 |      |
| Inpatient cost                                              | 77262.05               | 89289.19  | 66.7 | 82257.79             | 11043.20  | 70.3 | 67126.61              | 50313.70 | 61.7 |
| Outpatient cost                                             | 38506.89               | 21393.90  | 33.3 | 35974.21             | 24217.62  | 29.7 | 41717.34              | 16786.42 | 38.3 |
| <b>Panel B: Total direct non-medical costs</b>              | 45896.16               | 36451.59  |      | 50993.63             | 40194.46  |      | 39434.57              | 30119.78 |      |
| Accommodation                                               | 20754.26               | 24462.92  | 45.2 | 25599.94             | 25216.43  | 50.0 | 14611.85              | 22156.97 | 37.1 |
| Transportation                                              | 1238.21                | 1519.98   | 2.7  | 1327.32              | 1636.24   | 2.6  | 1125.25               | 1361.48  | 2.9  |
| Food and nutritional supplements                            | 16232.70               | 19562.25  | 35.4 | 17048.43             | 21022.11  | 33.4 | 15198.67              | 17631.77 | 38.5 |
| Hygiene cleaning products and auxiliary treatment equipment | 3063.38                | 4620.81   | 6.7  | 2726.92              | 4433.65   | 5.3  | 3489.87               | 4845.77  | 8.8  |
| Gifts and treats including electrical devices               | 4607.61                | 6310.41   | 10.0 | 4291.01              | 35151.27  | 8.4  | 5008.93               | 7549.15  | 12.7 |
| <b>Panel C: Total indirect costs</b>                        | 62403.41               | 174086.24 |      | 88457.34             | 226401.38 |      | 29377.31              | 46059.62 |      |

Table 4. Total cost and its components

|                                        | Total sample (n = 161) |           |      | Urban sample (n =90) |           |      | Rural sample (n = 71) |          |      |
|----------------------------------------|------------------------|-----------|------|----------------------|-----------|------|-----------------------|----------|------|
|                                        | Mean(RMB)              | SD        | %    | Mean(RMB)            | SD        | %    | Mean(RMB)             | SD       | %    |
| Total costs                            | 224068.47              | 229637.26 |      | 260682.96            |           |      | 177655.82             |          |      |
| Direct medical cost                    | 115768.90              | 102733.40 | 51.7 | 121231.99            | 126696.69 | 46.5 | 108843.94             | 60230.74 | 61.3 |
| Direct non-medical cost                | 45896.16               | 36451.59  | 20.5 | 50993.63             | 40194.46  | 19.6 | 39434.57              | 30119.78 | 22.2 |
| Indirect cost                          | 62403.41               | 174086.24 | 27.9 | 88457.34             | 226401.38 | 33.9 | 29377.31              | 46059.62 | 16.5 |
| Total household monthly<br>income, RMB | 8341.72                | 11942.80  |      | 10246.43             | 12814.06  |      | 5953.73               | 10356.65 |      |
| Family size                            | 4.1                    | 1.1       |      | 3.8                  | 1.0       |      | 4.5                   | 1.1      |      |

# BMJ Open

## Direct and indirect costs of families with a child with acute lymphoblastic leukemia in an academic hospital in China: a cross-sectional survey

|                                 |                                                                                                                                                                        |
|---------------------------------|------------------------------------------------------------------------------------------------------------------------------------------------------------------------|
| Journal:                        | <i>BMJ Open</i>                                                                                                                                                        |
| Manuscript ID                   | bmjopen-2019-030511.R1                                                                                                                                                 |
| Article Type:                   | Research                                                                                                                                                               |
| Date Submitted by the Author:   | 03-Jun-2019                                                                                                                                                            |
| Complete List of Authors:       | Ren, Yijiong; Shanghai Children's Medical Center, School of Medicine, Shanghai Jiao Tong University, China<br>Li, Xin; East China University of Science and Technology |
| <b>Primary Subject Heading</b>: | Health economics                                                                                                                                                       |
| Secondary Subject Heading:      | Oncology, Paediatrics                                                                                                                                                  |
| Keywords:                       | Child, Acute lymphoblastic leukemia, Family, China, Direct and indirect costs                                                                                          |
|                                 |                                                                                                                                                                        |

SCHOLARONE™  
Manuscripts

1  
2  
3 Direct and indirect costs of families with a child with acute lymphoblastic leukemia in an  
4  
5 academic hospital in China: a cross-sectional survey  
6

7 Yijiong Ren<sup>1†</sup>, PhD; Xin Li<sup>2\*†</sup>, PhD  
8  
9

10 <sup>1</sup>Shanghai Children's Medical Center, School of Medicine, Shanghai Jiao Tong University,  
11  
12 China  
13

14 <sup>2</sup>School of Social and Public Administration, East China University of Science and Technology  
15  
16

17  
18  
19 Address for Correspondence:  
20

21  
22 Xin Li, Ph.D.  
23 Room 111, 130 Meilong Rd  
24 School of Social and Public Administration  
25 East China University of Science and Technology  
26 Shanghai 200237, P. R. China  
27 Tel: 86-21-38762019  
28 Email: xinli@ecust.edu.cn  
29  
30  
31  
32  
33

34 <sup>†</sup>Drs Ren and Li contributed equally to this article.  
35  
36  
37  
38  
39  
40

41 Word count: 3518  
42  
43  
44  
45  
46  
47  
48  
49  
50  
51  
52  
53  
54  
55  
56  
57  
58  
59  
60

1  
2  
3 **Abstract:**  
4

5 **Objectives:** To estimate the direct and indirect costs in families with a child with acute  
6 lymphoblastic leukemia (ALL) in China.  
7

8  
9 **Design:** A single-site, cross-sectional survey of primary caregiver of a child with ALL was  
10 performed.  
11  
12

13  
14 **Setting and participants:** We analyzed the total costs incurred upon the completion of the first  
15 three-phase treatment (induction, consolidation, and intensification), which requires intensive  
16 hospitalization. Eligible patients were: a) diagnosed with ALL between 2010 and 2012 at  
17 Shanghai Children's Medical Center (SCMC), b) 0-14 years at diagnosis, and c) completed the  
18 first three-phase treatment at SCMC. The data was collected between October 2014 and  
19 December 2014.  
20  
21  
22  
23  
24  
25  
26  
27

28 **Outcome measures:** We decomposed the total costs into three categories (a) direct medical  
29 costs, which were further divided into outpatient and inpatient costs; (b) direct non-medical  
30 costs, which referred to expenses incurred in relation to the illness; and (c) indirect costs due to  
31 productivity loss.  
32  
33  
34  
35  
36

37 **Results:** A total of 161 patients were included in the study. Direct medical costs accounted for  
38 about 51.7% of the overall costs, and the rest of 48.3% of the total costs were attributed to direct  
39 non-medical costs and indirect costs. Regarding families with different household registration  
40 type (rural versus urban), the total costs were significantly different between the two groups  
41 (USD36125 vs. USD 25593;  $P = 0.021$ ). Specifically, urban families incurred significantly  
42 larger indirect costs than rural families (USD 12343 vs. USD 4157;  $P = 0.018$ ). Although the  
43 direct non-medical costs were not significantly different, urban families spent more money on  
44 hygiene cleaning products and auxiliary treatment equipment ( $P = 0.041$ ) and gifts and treats  
45 ( $P = 0.034$ ) than rural families.  
46  
47  
48  
49  
50  
51  
52  
53  
54  
55  
56  
57  
58  
59  
60

1  
2  
3 **Conclusions:** The financial burden faced by the Chinese families with a child with ALL was  
4  
5 tremendous, and the distributions of costs among the three categories were different between  
6  
7 urban and rural families.  
8  
9  
10  
11  
12  
13  
14  
15  
16  
17  
18  
19  
20  
21  
22  
23  
24  
25  
26  
27  
28  
29  
30  
31  
32  
33  
34  
35  
36  
37  
38  
39  
40  
41  
42  
43  
44  
45  
46  
47  
48  
49  
50  
51  
52  
53  
54  
55  
56  
57  
58  
59  
60

For peer review only

### Strengths and limitations of this study

- We estimated the direct and indirect costs in families with a child with acute lymphoblastic leukemia in China.
- We decomposed the estimates of the total costs into three categories: direct medical costs, direct non-medical costs and indirect costs due to productivity loss.
- Majority cost measures were based on parents' self-report and there might exist recall bias for some measures.

**Keywords:** Direct and indirect costs; Child; Acute lymphoblastic leukemia; Family; China

## Introduction

In China, the incidence of childhood cancer was 87.1 per million and the mortality was 36.3 per million in 2010<sup>1</sup>. Acute lymphoblastic leukemia (ALL) is the most common malignant disease among children, accounting for about 40% of all newly diagnosed childhood cancers<sup>1</sup>. The 5-year survival rate in childhood ALL has greatly increased over time and is now about 70% in China<sup>1</sup>. Regardless of better survival, life-saving therapy is costly and may result in a financial burden for these patients' families<sup>2-7</sup>. On the one hand, the costs of treatment of ALL and illness-related expenses are immense, on the other hand, parents may have to reduce their work hours, or give up paid work to care for their child resulting in loss of income.

Various studies have been conducted in developed countries to determine the costs associated with childhood cancer from a family perspective<sup>8</sup>. In these studies, the economic and financial impact of childhood cancer on families was examined on two primary cost categories: direct costs including the actual monetary expenditure related to the illness such as those associated with transport, food, accommodation, *etc.*<sup>3, 4, 9, 10</sup>, and indirect costs including the value of productivity loss such as cutting on work time, taking unpaid leave or quitting job<sup>4-7, 11-13</sup>. Although it is hard to make a precise comparison of the magnitude of the financial costs of families due to variation in study design, all studies reported substantial family financial burden associated with childhood cancer treatment. Specifically, two Canadian studies found that income loss due to work disruption and out-of-pocket expenses were estimated at over 30% of after-tax family income<sup>2, 6</sup>, and one American study reported that over 50% of the poorest families experienced annual income loss of more than 40%<sup>11</sup>.

While childhood cancer was shown to have an adverse economic consequence on families in developed countries, it is likely to have even more severe effects in developing countries. In

1  
2  
3 China, average treatment costs for childhood ALL were estimated to be between USD 15,128  
4 and USD 45,386<sup>14</sup>, whereas per capita income was USD 4270 in 2018. Although the Chinese  
5 government has made great efforts to provide universal health coverage by the year 2010, the  
6 coverage is typically shallow. 65.1% of childhood ALL patients' insurance covered less than  
7  
8 50% of overall medical costs<sup>14</sup>.  
9  
10  
11  
12  
13  
14  
15  
16

17 Unfortunately, medical costs are not the only financial burden faced by the Chinese families,  
18 the families with a child with ALL may also incur substantial additional costs associated with  
19 the illness. Specifically, there are huge differences in the allocation of medical resources  
20 between rural and urban areas, and among different provinces. High-quality medical resources  
21 are mainly distributed in large central cities such as Beijing, Shanghai, Guangzhou, *etc.*  
22 Therefore, families with a seriously ill child have to go to these cities to receive treatment for a  
23 better chance of survival. As a result, the corresponding non-medical out-of-pocket expenses  
24 may increase dramatically due to extra expenditures on transport, accommodation, *etc.* In  
25 addition, it is also hard for the parents to keep their jobs while taking care of the sick child,  
26 therefore resulting in loss of income.  
27  
28  
29  
30  
31  
32  
33  
34  
35  
36  
37  
38  
39  
40  
41

42 In addition to unequal distribution of medical resources, there are significant differences  
43 between urban and rural areas in terms of income and social security system in China. In 2018,  
44 urban per capita income was more than 2.5 times of rural per capita income (USD 5938 vs.  
45 USD 2211). Regarding the social security system, rural and urban populations are entitled to  
46 enroll in different health insurance schemes with different coverage plans, and unemployment  
47 and retirement insurances are only available to the urban working population. As a result, the  
48 economic burden is very likely to be different between rural and urban families.  
49  
50  
51  
52  
53  
54  
55  
56  
57  
58  
59  
60

1  
2  
3 As can be seen, the economic burden on Chinese families with a child with ALL could be  
4 devastated. Lacking financial aids from various sources may cause these families to fall from  
5 above to below the poverty line, or even give up treatment<sup>14</sup>. However, research on determining  
6 the costs associated with a childhood ALL is rare and the nature of these costs is poorly  
7 understood in developing countries<sup>15-18</sup>. It makes policy planning in the context of essential  
8 medicines, national fiscal policy towards childhood ALL and donor policy difficult without any  
9 reliable estimates of costs. The purpose of this paper was to estimate the economic burden in  
10 families with a child with ALL in China. In addition, we also reported the total costs and its  
11 three components for rural and urban families separately.  
12  
13  
14  
15  
16  
17  
18  
19  
20  
21  
22  
23  
24  
25

## 26 **Methods**

### 27 *Data and study population*

28  
29 The treatment of childhood ALL usually has four phases: induction, consolidation,  
30 intensification, and maintenance and lasts 2 to 3 years<sup>19</sup>. In the present paper, we estimated total  
31 costs incurred upon the completion of the first three-phase treatment (induction, consolidation,  
32 and intensification), which requires intensive hospitalization. Therefore, eligible patients were:  
33 a) diagnosed with ALL between 2010 and 2012 at Shanghai Children's Medical Center  
34 (SCMC), b) 0-14 years old at diagnosis, and c) completed the first three-phase treatment at  
35 SCMC. The data was collected between October 2014 and December 2014. The time between  
36 diagnosis and completion of the questionnaire was required to be greater than two years in order  
37 to capture parents' employment experiences throughout the treatment. Since quite a lot of the  
38 families were not living in Shanghai, face-to-face interviews were difficult to conduct. As an  
39 alternative, we conducted telephone interviews on the parents. Only one parent of the child,  
40 who self-identified as the major caregiver of the child answered the questionnaire. The  
41 interview lasted about 30-45 minutes. We obtained approval from the Institutional Review  
42  
43  
44  
45  
46  
47  
48  
49  
50  
51  
52  
53  
54  
55  
56  
57  
58  
59  
60

1  
2  
3 Board of Shanghai Children's Medical Center to conduct the study.  
4

### 5 *Pre-testing*

6  
7 In order to ensure the rationality and accuracy of the questionnaire, we pre-tested the  
8 questionnaire with 15 parents with a child with ALL who were randomly picked during their  
9 follow-up visits to the center. During this period, we revised the questionnaire many times to  
10 make sure that parents understood the questions, did not feel uncomfortable, and were aware  
11 of their costs reflecting the costs incurred during the induction, consolidation and intensification  
12 phases, not the costs associated with the maintenance therapy.  
13  
14  
15  
16  
17  
18  
19  
20  
21  
22

### 23 *Measures*

24 We decomposed the costs into three categories (a) direct medical costs, which were further  
25 divided into outpatient and inpatient costs; (b) direct non-medical costs, which referred to  
26 expenses incurred in relation to the illness; and (c) indirect costs due to productivity loss.  
27  
28  
29  
30  
31  
32  
33

34  
35 The questionnaire included three modules. The first module asked questions about socio-  
36 demographic characteristics of parents and their child. The second module included direct non-  
37 medical cost questions. The last module focused on indirect cost questions. More specifically,  
38 the details of these modules were shown as follows:  
39  
40  
41  
42  
43  
44  
45

46 Demographic and socioeconomic variables: child age at diagnosis, child gender and whether  
47 child had health insurance, parent's age at diagnosis, the highest degree of parental education  
48 (elementary or lower, high/vocational school or lower, or college and above), family monthly  
49 income, family size, household registration type (Hukou types: rural versus urban), place of  
50 residence (Shanghai versus other provinces).  
51  
52  
53  
54  
55  
56  
57  
58  
59  
60

1  
2  
3 Direct non-medical cost variables: direct non-medical costs included expenses related to illness  
4 during the period of the first three stages of treatment. Specifically, parent was asked to provide  
5 information on: a) expenses on accommodation per month including rent and utility fee; b)  
6 expenses on transportation; c) increased expenses on food and nutritional supplements per  
7 month; d) expenses on hygiene cleaning products and auxiliary treatment equipment, such as  
8 ultraviolet disinfection lamp, air purifier, humidifier, *etc.*; e) expenses on gifts and treats  
9 including electrical devices (e.g. computer, TV, video games *etc.*) and network fee.  
10  
11  
12  
13  
14  
15  
16  
17  
18  
19  
20

21 Indirect cost variables: indirect costs were the costs associated with lost productivity due to  
22 illness. In the present paper, parent was asked to provide information on employment status at  
23 diagnosis and during the treatment period, changes in role or hours worked since diagnosis and  
24 length of absence from work. Informant was also asked to complete this section for his or her  
25 partner. The indirect costs were measured by lost earnings using the human capital approach.  
26  
27  
28  
29  
30  
31  
32  
33  
34

35 Direct medical cost variables: The computerized database of medical costs at SCMC was  
36 established in 1998. The database strictly adheres to medical administration regulations.  
37 According to the administration system, all medicines and blood products should be supplied  
38 by the department of pharmacy and blood bank at SCMC. All lab tests and non-lab tests  
39 (including EEG, EKG, and various diagnostic imaging) should be done at SCMC as well. All  
40 outpatient and hospitalization costs were recorded according to their names/case numbers. In  
41 the present paper, overall outpatient and inpatient costs for each child with ALL between the  
42 confirmation of diagnosis at SCMC and the completion of the intensification therapy were  
43 collected from the database. The components of costs included costs for western medicine,  
44 Chinese medicine, blood products, lab tests, non-lab tests, hospital bed/daycare, consultant fees,  
45 using the nursing injection facility and consumption of materials and oxygen. In addition, the  
46  
47  
48  
49  
50  
51  
52  
53  
54  
55  
56  
57  
58  
59  
60

1  
2  
3 database also contained information on inpatient expenses paid by insurance for local patients.  
4  
5  
6

### 7 ***Patient and public involvement***

8  
9  
10 No patients were involved in the development of the research question, the outcome measures,  
11  
12 the design or implementation of the study. There are no plans about the dissemination of the  
13  
14 results.  
15  
16

### 17 ***Statistical Analysis***

18  
19  
20 All data were reviewed for completeness and relevance. Data were entered into Microsoft Excel  
21  
22 and imported into the STATA 13 statistical package (Stata Corporation, College Station, TX,  
23  
24 USA) for analysis. Descriptive statistics were used to describe the sample characteristics and  
25  
26 categorize the types and values of cost categories and items. The Chi-square tests and the *t* tests  
27  
28 were used for bivariate comparisons of categorical and continuous variables for the urban and  
29  
30 rural families, respectively. The amounts of all cost categories were projected to the estimates  
31  
32 that incurred during the treatment. We expressed all cost estimates in 2010 RMB by using the  
33  
34 Consumer Price Index and then converted in USD by using the average exchange rate between  
35  
36 RMB and USD in 2010 (USD 1.00 = RMB 6.7695). Total costs were then computed as the sum  
37  
38 of all cost categories for the sample. *T*-tests were used to examine the rural vs. urban differences  
39  
40 in all cost estimates.  
41  
42  
43  
44  
45  
46  
47  
48

### 49 **Results**

50  
51 Medical expenses and parental contact information of a total of 171 patients were extracted  
52  
53 from the SCMC database. We contacted the 171 parents using the telephone numbers provided  
54  
55 in the database and 161 parents gave the consent before we conducted the interview. The 10  
56  
57 failed calls were due to either loss of contact or refuse to participate.  
58  
59  
60

1  
2  
3  
4  
5 Table 1 presents the child, parent, and family characteristics for the whole sample and for the  
6 urban and rural subsamples. The mean patient age at diagnosis was 4.9 years (standard  
7 deviation (SD) = 3.3 years; range: 0-14 years), the majority were male (58.4%). The average  
8 length of therapy (induction, consolidation, and intensification) was 11.6 months (SD = 9.6  
9 months). 52 patients (33.1%) did not have any insurance at the time of diagnosis. The mean age  
10 of parents at diagnosis was 33.2 years (SD = 4.3 years), the majority of the parents' highest  
11 education level was high/vocational school or below (61.9%). In terms of household  
12 characteristics, the average family size was 4.1 (SD = 1.1), 71 households (44.1%) had rural  
13 registration and only 33 households (20.6 %) were local residents (Shanghai). The average  
14 household monthly income at diagnosis was USD1232.25. Regarding urban and rural families,  
15 the highest education for parents in an urban area was significantly higher than that of parents  
16 from a rural area ( $P < 0.001$ ). In addition, urban families had smaller family size ( $P < 0.001$ ),  
17 higher monthly income ( $P = 0.02$ ) and were more likely to be local residents ( $P < 0.001$ ) than  
18 their rural counterparts.  
19  
20  
21  
22  
23  
24  
25  
26  
27  
28  
29  
30  
31  
32  
33  
34  
35  
36  
37  
38  
39

40 Table 2 describes the parents' employment statuses at the time of diagnosis and during the  
41 treatment period. On diagnosis, 35(22%) fathers worked in government, state-owned enterprise  
42 (SOE) or public sector, 109(68.6%) worked in private sector or self-employed, 11(6.9%) were  
43 farmers and 4(2.5%) were unemployed. During the treatment, 47 working fathers managed to  
44 keep their employment status unchanged, 13 completely stopped working, and 97 reported to  
45 take extended absences from work. The average length of absences was 14.4 months (SD =  
46 11.1 months). Regarding mothers, on diagnosis, 32(20.1%) worked in government, SOE or  
47 public sector, 73(45.9) worked in private sector or self-employed, 16(10.1%) were farmers and  
48 38(23.9%) were unemployed or doing housework. Among those who had a job, 14.8% did not  
49  
50  
51  
52  
53  
54  
55  
56  
57  
58  
59  
60

1  
2  
3 change their employment status, 6.6% stopped working, and the majority of working mothers  
4  
5 (78.7%) took extended absences from work. The average length of absences was 18.1 months  
6  
7 (SD = 10.8 months).  
8  
9

10  
11  
12 The three categories of the total costs and their components for the whole sample are given in  
13  
14 Table 3. Panel A reported that the average total medical costs during the treatment were USD  
15  
16 16307 (SD = 14488; interquartile range (IQR) 9441–18120). Medical costs were then divided  
17  
18 into two subcategories: outpatient and inpatient costs. The inpatient costs accounted for the  
19  
20 majority of the total medical costs (66.9%). Panel B of Table 3 presents the direct non-medical  
21  
22 costs incurred during the treatment. The average direct non-medical costs were USD 6441 (SD  
23  
24 = 5038; IQR 3013-8543) with the largest expenditure on accommodation. The average indirect  
25  
26 costs incurred during the treatment (Panel C of Table 3) were estimated to be USD 8733 (SD =  
27  
28 24321; IQR 0-6727). On average, the total costs for the whole sample were USD 31480 (SD =  
29  
30 31847; IQR 15518-33177). The direct medical costs accounted for more than half of the total  
31  
32 costs (51.8%), followed by indirect costs (27.7%) and direct non-medical costs (20.5%).  
33  
34  
35  
36  
37  
38  
39

40 Table 4 reports the total costs and their components for rural and urban families, respectively.  
41  
42 The total costs were significantly different between the two groups (mean: USD 36125 vs. USD  
43  
44 25592; P = 0.021). Regarding to the three cost categories, the urban families incurred  
45  
46 significantly larger indirect costs than the rural families (mean: USD 12343 vs. USD 4157; P =  
47  
48 0.018). Although the direct non-medical costs were not significantly different, the urban  
49  
50 families spent more money on hygiene cleaning products and auxiliary treatment equipment (P  
51  
52 = 0.041) and gifts and treats (P = 0.034) than the rural families.  
53  
54  
55  
56  
57

## 58 Discussion

59  
60

1  
2  
3 A cancer diagnosis in childhood can substantially affect the physical, psychosocial, and  
4 socioeconomic well-being of patients and their families. Yet, research on determining the costs  
5 associated with a childhood ALL is rare and the nature of these costs is poorly understood,  
6 especially in developing countries. The present study provides a breakdown of families' costs  
7 and resource use and an in-depth understanding of families' financial burden. We found that the  
8 financial burden faced by Chinese families with a child with ALL was tremendous. Among the  
9 three cost categories, direct medical costs accounted for about 51.8% of the overall costs, and  
10 the rest of 48.2% of the total costs were attributed to direct non-medical costs and indirect costs.  
11 Regarding families with different household registration type (rural versus urban), the  
12 distributions of costs among the three categories were different. Productivity loss contributed a  
13 much higher weight in total costs for urban families than for rural families. In addition, rural  
14 families spent most of their money on the treatment of ALL.  
15  
16  
17  
18  
19  
20  
21  
22  
23  
24  
25  
26  
27  
28  
29  
30  
31  
32

33 Our results showed that the average medical costs were approximately USD 16307, which were  
34 comparable to the findings from previous studies using data of developing countries<sup>14, 15, 20</sup>.  
35 Unlike most developed countries where costs of treatment are borne mainly by the public sector  
36 and health insurance<sup>4, 13</sup>, patients in developing countries have to bear a significant portion of  
37 direct medical costs<sup>16, 17</sup>. According to the health insurance regulations of China, if patient  
38 chooses to receive treatment in other province or city, or in non-designated hospital, the  
39 reimbursement rate could be very low or none at all. Although we were unable to determine  
40 this from our study directly, one report did have shown that the actual reimbursement rate was  
41 less than 50% for most of the rural families with a child with leukemia, of which around 27%  
42 of children only got 30% of reimbursement<sup>14</sup>. In addition, in the questionnaire we asked “any  
43 comments or suggestions on current insurance reimbursement policy?” more than half of the  
44 non-local parents (57.8%; data not shown) mentioned that the reimbursement rate was too low.  
45  
46  
47  
48  
49  
50  
51  
52  
53  
54  
55  
56  
57  
58  
59  
60

1  
2  
3 Specifically, they identified the low reimbursement mainly due to the following reasons: there  
4 existed a big gap on reimbursement rate between local and non-local residents; outpatient and  
5 imported medicines were not covered by the insurance, and the reimbursement procedure across  
6 provinces was tedious and time-consuming, and the actual reimbursement rate was low, so  
7 some parents chose to forgo reimbursement.  
8  
9  
10  
11  
12  
13  
14  
15  
16

17 In contrast to the previous literature which found that transport took a significant portion of  
18 family financial cost<sup>9, 10, 21</sup>, our results showed that transport only contributed to 2.7% of the  
19 total direct non-medical costs, whereas around 45% of the total direct non-medical expenses  
20 were spent on accommodation. That was because most of the non-local families chose to rent  
21 near the hospital, which saved travel costs. Although the very poor families can receive 30 days  
22 of accommodation at the center at very low price<sup>15</sup>, space is limited and the 30-day rental period  
23 is far from enough. Most non-local families had to rent a room or an apartment near the hospital  
24 for about USD146.02-USD730.09 per month for an average 12 months. Food and nutritional  
25 supplements accounted for about 35% of the total direct non-medical cost. As described by  
26 Tsimicalis et al. (2013), increased expenses on food were to accommodate the child's  
27 fluctuating weight, satisfy food cravings, taste alterations, *etc.*<sup>10</sup>.  
28  
29  
30  
31  
32  
33  
34  
35  
36  
37  
38  
39  
40  
41  
42  
43  
44

45 Following diagnosis, 85% of working mothers and 70% of working fathers gave up all paid  
46 employment or took unpaid extended leaves in our sample. These numbers were much higher  
47 than those reported in the previous studies<sup>4, 6, 12, 13</sup>. The possible explanation was that in our  
48 sample, the majority families were from other provinces (79%), and it was hard for only one  
49 parent to handle all the issues related to treatment, accommodation, food, *etc.*, therefore, both  
50 parents had to quit their jobs or took unpaid leaves during the treatment.  
51  
52  
53  
54  
55  
56  
57  
58  
59  
60

1  
2  
3 Our data indicated that families with high socio-economic status were more likely to receive  
4 treatment in high-quality medical facilities. Specifically, according to data from the National  
5 Bureau of Statistics of China, in 2010, the annual urban per capita income was USD 2822.87,  
6 and the amount was RMB874.36 in the rural areas<sup>22</sup>. However, our data indicated that the  
7 sample urban per capita income was 1.9\* times that of the national urban average and the ratio  
8 became 2.4 times for the rural per capita income. In addition, our data showed that the total  
9 costs were 1.79 times of the sample urban family's annual income, and were 2.72 times of the  
10 sample rural family's annual income. This finding indicated that even for these high socio-  
11 economic families, the economic burden of childhood ALL was huge, especially for rural  
12 families.

13  
14  
15  
16  
17  
18  
19  
20  
21  
22  
23  
24  
25  
26  
27  
28 Our findings have very important policy implications. First, policymakers should make effort  
29 on simplifying the reimbursement procedure across provinces and eliminating the huge  
30 disparities in reimbursement ratio across regions; second, our sample indicated 33% of patients  
31 did not have any insurance at diagnosis, although we did not have direct data on why these  
32 parents chose not to purchase insurance for their child, previous study has shown that lack of  
33 knowledge or the concept of insurance could be a major barrier for people from participating  
34 the insurance program<sup>23</sup>, therefore, the government should work hard on educating people  
35 regarding the different programs; third, patients with cancer and their families may need  
36 ongoing financial management with a designated financial advisor well beyond the initial  
37 treatment phase to help them manage debt, access resources to cope with direct and indirect  
38 costs of cancer treatment and maintain patients' and families' financial capacity later in life.

---

57 \*Sample annual urban per capita income was calculated as: urban household monthly income\*12/family  
58 size, using the data from Table 1.  
59  
60

1  
2  
3  
4  
5 There are limitations to this study. First, majority measures were based on parents' self-report,  
6 and there may exist recall bias for some measures. However, to minimize recall bias, before  
7 conducting a formal interview, we contacted them one week in advance and asked parents to  
8 recall and list out the details of all the expenses during the treatment. After the interview, we  
9 double checked data. If there was inconsistency in the data, we called back to clarify. Second,  
10 while the generalizability of this study may be somewhat limited as we focused on one hospital,  
11 SCMC, as one of the primary pediatric tertiary care centers in China, it provides treatment of  
12 severe disease in children around China (Our data showed that 79% of patients were non-local  
13 residents). Therefore, our results are likely applicable to other geographic areas. Third, our  
14 sample included the families who were relatively rich compare with the national average, which  
15 limited our ability to assess the financial impact among the families with low socio-economic  
16 status.  
17  
18  
19  
20  
21  
22  
23  
24  
25  
26  
27  
28  
29  
30  
31  
32  
33  
34

35 Families of children with ALL experience a wide range of costs. An ongoing investigation of  
36 families' costs will yield a rich understanding of the disease costs, formulate the basis of cost  
37 assessments, and lend insight into practice and policy changes aimed at lessening the economic  
38 impact of this burden.  
39  
40  
41  
42  
43  
44  
45  
46  
47  
48  
49  
50  
51  
52  
53  
54  
55  
56  
57  
58  
59  
60

### **Contribution Statement**

YR and XL designed the study, developed a data analysis plan and equally contributed to this study. XL performed a statistical analysis of the data. All authors made significant contributions to the interpretation of results and participated in drafting and revising the manuscript. All authors have approved the final version.

### **Competing Interests**

None.

### **Ethics approval**

This study was approved by the Institutional Review Board of Shanghai Children's Medical Center.

### **Funding**

This work was supported by the Fundamental Research Funds for the Central Universities of China (Grant No. 17JCYA03).

### **Data Sharing Statement**

Data are not available because the authors promised the SCMC that the information was only used for research, and it would not be disclosed.

## References

1. Zheng R, Peng X, Zeng H, etc. Incidence, mortality and survival of childhood cancer in China during 2000 – 2010 period: A population-based study. *Cancer Letter*, 2015; 363(2): 176-180.
2. Barr R, Furlong W, Horsman J, etc. The monetary costs of children cancer to the families of patients. *International Journal of Oncology*, 1996; 8: 933-940.
3. Dockerty JD, Skegg DC, Williams SM. Economic effects of childhood cancer on families. *Journal of Pediatrics and Child Health*, 2003; 39:254-258.
4. Eiser C, Upton P. Costs of Caring for a Child with Cancer: A Questionnaire Survey. *Child: Health and Development*, 2007; 33(4): 455-459.
5. Dussel V, Bona K, Heath JA, etc. Unmeasured costs of a child's death: Perceive financial burden, work disruptions, and economic coping strategies used by American and Australian families who lost children to cancer. *Journal of Clinical Oncology*, 2011; 29:1007-1013.
6. Tsimicalis A, Stevens B, Ungar WJ, etc. A prospective study to determine the costs incurred by families of children newly diagnosed with cancer in Ontario. *Psychooncology* 2012; 21:1113-1123.
7. Warner EL, Kirchhoff AC, Nam GE, et al. Financial Burden of Pediatric Cancer for Patients and Their Families. *Journal of Oncology Practice*, 2015; 11: 12-18.
8. Pelletier W, Bona K. Assessment of Financial Burden as a Standard of Care in Pediatric Oncology. *Pediatric Blood and Cancer*, 2015; 62: S619-S631.
9. Cohn RJ, Goodenough B, Foreman T, Suneson J. Hidden financial costs in treatment for childhood cancer: An Australian study of lifestyle implications for families absorbing out-of-pocket expenses. *Journal of Pediatric Hematology/Oncology*, 2003; 25:854-863.
10. Tsimicalis A, Stevens B, Ungar W, et al. A Mixed Method Approach to Describe the Out-

- of-Pocket Expenses Incurred by Families of Children with Cancer. *Pediatric Blood and Cancer*, 2013; 60: 438-445.
11. Bona K, Dussel V, Orellana L, etc. Economic impact of advanced pediatric cancer on families. *Journal of Pain and Symptom Management*, 2014; 47:594-603.
  12. Fluchel MN, Kirchhoff AC, Bodson J, etc. Feograph and the burden of care in pediatric cancers. *Pediatric Blood and Cancer*, 2014; 61:1918-1924.
  13. Limburg H, Shaw Ak, McBride ML. Impact of childhood cancer on parental employment and sources of income: a Canadian pilot study. *Pediatric Blood and Cancer*, 2008; 51:93-98.
  14. Red Cross Report. A report on the living conditions of children diagnosed with leukemia in rural China. 2013 (in Chinese). Available at: <https://wenku.baidu.com/view/7004a99b4afe04a1b071dec5.html>.
  15. Liu Y, Chen J, Tang JY, et al. Cost of Childhood Acute Lymphoblastic Leukemia Care in Shanghai, China. *Pediatric Blood and Cancer*, 2009; 53: 557-562.
  16. Islam A, Akhter A, Eden T. Cost of Treatment for Children with Acute Lymphoblastic Leukemia in Bangladesh. *Journal of Cancer Policy*, 2015; 6: 37-43.
  17. Ghatak N, Trehan A, Bansal D. Financial Burden of Therapy in Families with a Child with Acute Lymphoblastic Leukemia: Report from North India. *Supportive Care in Cancer*, 2016; 24: 103-108.
  18. Wang J, Shen N, Zhang X, et al. Care Burden and its Predictive Factors in Parents of Newly Diagnosed Children with Acute Lymphoblastic Leukemia in Academic Hospitals in China. *Supportive Care in Cancer*, 2017; 25: 3703-3713.
  19. Seibel N. Treatment of acute lymphoblastic leukemia in children and adolescents: Peaks and pitfalls. *Hematology*, 2008; 1:374-380.

- 1  
2  
3 20. Bhakta, N, Martiniuk, ALC, Gupta, S, et. al. The cost effectiveness of treating paediatric  
4 cancer in low-income and middle-income countries: a case-study approach using acute  
5 lymphocytic leukaemia in Brazil and Burkitt lymphoma in Malawi. Archives of Disease  
6 in Childhood, 2013; 98(2): 155-160.  
7  
8  
9  
10  
11  
12 21. Miedema B, Easley J, Fortin P, et al. The economic impact on families when a child is  
13 diagnosed with cancer. Current Oncology, 2008; 15:93-98.  
14  
15  
16  
17 22. National Bureau of Statistics of China. 2011. Data available at:  
18 <http://www.stats.gov.cn/tjsj/ndsj/2011/indexch.htm>.  
19  
20  
21 23. Li, X and Zhang, W. The impacts of health insurance on health care utilization among the  
22 elderly in China. Social Science & Medicine, 2013; 85:59-65.  
23  
24  
25  
26  
27  
28  
29  
30  
31  
32  
33  
34  
35  
36  
37  
38  
39  
40  
41  
42  
43  
44  
45  
46  
47  
48  
49  
50  
51  
52  
53  
54  
55  
56  
57  
58  
59  
60

Table 1. Child, parent, and family characteristics (n=161)

| Characteristics                                             | Total (N=161) |           | Urban (N=90) |           | Rural (N=71) |           | P-value |
|-------------------------------------------------------------|---------------|-----------|--------------|-----------|--------------|-----------|---------|
|                                                             | N             | %         | N            | %         | N            | %         |         |
| <b>Child characteristics</b>                                |               |           |              |           |              |           |         |
| Age at diagnosis, years (mean, SD)                          | 4.9           | (3.3)     | 4.7          | (3.2)     | 5.1          | (3.3)     | 0.48    |
| Average treatment period, months (mean, SD)                 | 11.6          | (9.6)     | 12.4         | (10.4)    | 10.6         | (8.5)     | 0.25    |
| <b>Gender</b>                                               |               |           |              |           |              |           |         |
| Male                                                        | 94            | 58.4      | 54           | 60.0      | 40           | 56.3      | 0.64    |
| Female                                                      | 67            | 41.6      | 36           | 40.0      | 31           | 43.7      |         |
| No Health insurance                                         | 52            | 33.1      | 32           | 35.5      | 20           | 28.1      | 0.33    |
| <b>Parent characteristics</b>                               |               |           |              |           |              |           |         |
| Age at diagnosis, years (mean, SD)                          | 33.2          | (4.3)     | 33.6         | (4.4)     | 32.8         | (4.7)     | 0.34    |
| <b>Education (the highest degree of parental education)</b> |               |           |              |           |              |           |         |
| Middle school or lower                                      | 67            | 41.9      | 18           | 20.0      | 50           | 70.4      | <0.001  |
| High/vocational school                                      | 32            | 20.0      | 17           | 18.9      | 15           | 21.1      |         |
| College or above                                            | 61            | 38.1      | 55           | 61.1      | 6            | 8.5       |         |
| <b>Household characteristics</b>                            |               |           |              |           |              |           |         |
| Family size (mean, SD)                                      | 4.1           | (1.1)     | 3.8          | (0.9)     | 4.5          | (1.1)     | <0.001  |
| Household monthly income, USD (mean, SD)                    | 1287.31       | (2518.36) | 1681.56      | (3082.12) | 783.35       | (1379.65) | 0.02    |
| <b>Area of residence</b>                                    |               |           |              |           |              |           |         |
| Shanghai                                                    | 33            | 20.6      | 30           | 33.3      | 3            | 4.2       | <0.001  |
| Other provinces                                             | 128           | 79.4      | 60           | 66.7      | 68           | 95.8      |         |

Table 2. Employment status of parents

| Characteristics                                                                      | N      | %    | N      | %    |
|--------------------------------------------------------------------------------------|--------|------|--------|------|
| <b><i>Employment at diagnosis</i></b>                                                | Father |      | Mother |      |
| Government, SOE, or Public sector                                                    | 35     | 22.0 | 32     | 20.1 |
| Private sector or self-employed                                                      | 109    | 68.6 | 73     | 45.9 |
| Agriculture                                                                          | 11     | 6.9  | 16     | 10.1 |
| Unemployed or doing housework                                                        | 4      | 2.5  | 38     | 23.9 |
| <b><i>Change of employment status<br/>(conditional on employed at diagnosis)</i></b> | Father |      | Mother |      |
| No change                                                                            | 47     | 29.9 | 18     | 14.8 |
| Completely stop working                                                              | 13     | 8.3  | 8      | 6.6  |
| Extended leave                                                                       | 97     | 61.7 | 96     | 78.7 |
| Average length of absence,<br>months (mean, SD)                                      | 14.4   | 11.1 | 18.1   | 10.8 |

Table 3. Total cost and its components (in 2010 US\$)\*

|                                                             | Total sample (n = 161) |              |       |       |      |
|-------------------------------------------------------------|------------------------|--------------|-------|-------|------|
|                                                             | Median                 | IQR          | Mean  | SD    | %    |
| <b><i>Panel A: Total direct medical costs</i></b>           | 12562                  | 9441 - 18120 | 16307 | 14488 |      |
| Inpatient cost                                              | 7064                   | 5097 - 11786 | 7622  | 18645 | 66.9 |
| Outpatient cost                                             | 5272                   | 3391 - 6712  | 7031  | 6843  | 33.1 |
| <b><i>Panel B: Total direct non-medical costs</i></b>       | 5220                   | 3013 - 8543  | 6441  | 5038  |      |
| Accommodation                                               | 2158                   | 280 - 3700   | 2898  | 3357  | 45.0 |
| Transportation                                              | 112                    | 44 - 219     | 175   | 219   | 2.7  |
| Food and nutritional supplements                            | 1682                   | 392 - 2864   | 2289  | 2743  | 35.5 |
| Hygiene cleaning products and auxiliary treatment equipment | 177                    | 59 - 505     | 429   | 651   | 6.7  |
| Gifts and treats including electrical devices               | 428                    | 123 - 841    | 651   | 888   | 10.1 |
| <b><i>Panel C: Total indirect costs</i></b>                 | 1677                   | 0 - 6727     | 8733  | 24321 |      |
| <b><i>Total costs</i></b>                                   | 22702                  | 15518-33177  | 31480 | 31847 |      |

\*The average exchange rate between RMB and USD in 2010 is 6.7695.

Table 4. Costs of different categories during the treatment (in 2010 USD)\*

|                                                             | Urban sample (n =90) |               |       |       |      | Rural sample (n = 71) |               |       |       |      | P-Value** |
|-------------------------------------------------------------|----------------------|---------------|-------|-------|------|-----------------------|---------------|-------|-------|------|-----------|
|                                                             | Median               | IQR           | Mean  | SD    | %    | Median                | IQR           | Mean  | SD    | %    |           |
| <b>Panel A: Total direct medical costs</b>                  | 11820                | 8680 - 17158  | 17075 | 17854 |      | 12857                 | 9939 - 18660  | 15332 | 8531  |      | 0.393     |
| Inpatient cost                                              | 7064                 | 5018 - 11458  | 12048 | 15571 | 70.6 | 6894                  | 5157 - 11786  | 9475  | 7176  | 61.7 | 0.155     |
| Outpatient cost                                             | 4735                 | 2803 - 6375   | 5027  | 3383  | 29.4 | 5634                  | 4495 - 6843   | 5858  | 2321  | 38.3 | 0.074     |
| <b>Panel B: Total direct non-medical costs</b>              | 5343                 | 2873 - 9447   | 6707  | 5535  |      | 5204                  | 3443 - 7265   | 6104  | 4342  |      | 0.468     |
| Accommodation                                               | 1752                 | 0 - 3900      | 2830  | 3880  | 42.2 | 2568                  | 1430 - 3676   | 2983  | 2569  | 48.9 | 0.727     |
| Transportation                                              | 137                  | 30 - 280      | 189   | 207   | 2.8  | 109                   | 56 - 178      | 156   | 233   | 2.6  | 0.376     |
| Food and nutritional supplements                            | 1773                 | 221 - 3418    | 2392  | 2849  | 35.7 | 1472                  | 463 - 2482    | 2158  | 2618  | 35.4 | 0.597     |
| Hygiene cleaning products and auxiliary treatment equipment | 281                  | 74 - 675      | 520   | 706   | 7.8  | 103                   | 36 - 278      | 313   | 556   | 5.1  | 0.041     |
| Gifts and treats including electrical devices               | 519                  | 147 - 981     | 774   | 1067  | 11.5 | 328                   | 70 - 701      | 494   | 558   | 8.1  | 0.034     |
| <b>Panel C: Total indirect costs</b>                        | 463                  | 0 - 7379      | 12343 | 31598 |      | 1822                  | 44 - 6391     | 4157  | 6677  |      | 0.018     |
| <b>Total costs</b>                                          | 22154                | 14036 - 41289 | 36125 | 40487 |      | 22860                 | 16065 - 30601 | 25593 | 13088 |      | 0.021     |

\* The average exchange rate between RMB and USD in 2010 is 6.7695.

\*\* P value for *t* test comparing means between rural and urban samples.

1  
2  
3  
4  
5  
6  
7  
8  
9  
10  
11  
12  
13  
14  
15  
16  
17  
18  
19  
20  
21  
22  
23  
24  
25  
26  
27  
28  
29  
30  
31  
32  
33  
34  
35  
36  
37  
38  
39  
40  
41  
42  
43  
44  
45  
46  
47  
48  
49  
50  
51  
52  
53  
54  
55  
56  
57  
58  
59  
60STROBE Statement—Checklist of items that should be included in reports of *cohort studies*

|                          | Item No | Recommendation                                                                                                                                                                                    | Section and page number (P)      |
|--------------------------|---------|---------------------------------------------------------------------------------------------------------------------------------------------------------------------------------------------------|----------------------------------|
| Title and abstract       | 1       | (a) Indicate the study's design with a commonly used term in the title or the abstract                                                                                                            | Title page (P1)<br>Abstract (P2) |
|                          |         | (b) Provide in the abstract an informative and balanced summary of what was done and what was found                                                                                               | Abstract (P2–3)                  |
| <b>Introduction</b>      |         |                                                                                                                                                                                                   |                                  |
| Background/rationale     | 2       | Explain the scientific background and rationale for the investigation being reported                                                                                                              | Introduction (P4–6)              |
| Objectives               | 3       | State specific objectives, including any prespecified hypotheses                                                                                                                                  | Introduction (P7)                |
| <b>Methods</b>           |         |                                                                                                                                                                                                   |                                  |
| Study design             | 4       | Present key elements of study design early in the paper                                                                                                                                           | Methods (P7)                     |
| Setting                  | 5       | Describe the setting, locations, and relevant dates, including periods of recruitment, exposure, follow-up, and data collection                                                                   | Methods (P7–8)                   |
| Participants             | 6       | (a) Give the eligibility criteria, and the sources and methods of selection of participants. Describe methods of follow-up                                                                        | Methods (P7–8)                   |
|                          |         | (b) For matched studies, give matching criteria and number of exposed and unexposed                                                                                                               | N/A                              |
| Variables                | 7       | Clearly define all outcomes, exposures, predictors, potential confounders, and effect modifiers. Give diagnostic criteria, if applicable                                                          | Methods (P8)                     |
| Data sources/measurement | 8*      | For each variable of interest, give sources of data and details of methods of assessment (measurement). Describe comparability of assessment methods if there is more than one group              | Methods (P8–10)                  |
| Bias                     | 9       | Describe any efforts to address potential sources of bias                                                                                                                                         | Methods (P8)<br>Discussion (P16) |
| Study size               | 10      | Explain how the study size was arrived at                                                                                                                                                         | Results (P10–11)                 |
| Quantitative variables   | 11      | Explain how quantitative variables were handled in the analyses. If applicable, describe which groupings were chosen and why                                                                      | Methods (P10)                    |
| Statistical methods      | 12      | (a) Describe all statistical methods, including those used to control for confounding                                                                                                             | Methods (P10)                    |
|                          |         | (b) Describe any methods used to examine subgroups and interactions                                                                                                                               | Methods (P10)                    |
|                          |         | (c) Explain how missing data were addressed                                                                                                                                                       | N/A                              |
|                          |         | (d) If applicable, explain how loss to follow-up was addressed                                                                                                                                    | N/A                              |
|                          |         | (e) Describe any sensitivity analyses                                                                                                                                                             | N/A                              |
| <b>Results</b>           |         |                                                                                                                                                                                                   |                                  |
| Participants             | 13*     | (a) Report numbers of individuals at each stage of study—eg numbers potentially eligible, examined for eligibility, confirmed eligible, included in the study, completing follow-up, and analysed | Results (P10–12)                 |
|                          |         | (b) Give reasons for non-participation at each stage                                                                                                                                              | N/A                              |

|                          |     |                                                                                                                                                                                                              |                                 |
|--------------------------|-----|--------------------------------------------------------------------------------------------------------------------------------------------------------------------------------------------------------------|---------------------------------|
|                          |     | (c) Consider use of a flow diagram                                                                                                                                                                           | N/A                             |
| Descriptive data         | 14* | (a) Give characteristics of study participants (eg demographic, clinical, social) and information on exposures and potential confounders                                                                     | Tables 1, 2<br>Results (P10-11) |
|                          |     | (b) Indicate number of participants with missing data for each variable of interest                                                                                                                          | N/A                             |
|                          |     | (c) Summarise follow-up time (eg, average and total amount)                                                                                                                                                  | N/A                             |
| Outcome data             | 15* | Report numbers of outcome events or summary measures over time                                                                                                                                               | Tables 3, 4                     |
| Main results             | 16  | (a) Give unadjusted estimates and, if applicable, confounder-adjusted estimates and their precision (eg, 95% confidence interval). Make clear which confounders were adjusted for and why they were included | Tables 3<br>Results (P12)       |
|                          |     | (b) Report category boundaries when continuous variables were categorized                                                                                                                                    | N/A                             |
|                          |     | (c) If relevant, consider translating estimates of relative risk into absolute risk for a meaningful time period                                                                                             | N/A                             |
| Other analyses           | 17  | Report other analyses done—eg analyses of subgroups and interactions, and sensitivity analyses                                                                                                               | Table 4<br>Results (P12-13)     |
| <b>Discussion</b>        |     |                                                                                                                                                                                                              |                                 |
| Key results              | 18  | Summarise key results with reference to study objectives                                                                                                                                                     | Discussion (P13)                |
| Limitations              | 19  | Discuss limitations of the study, taking into account sources of potential bias or imprecision. Discuss both direction and magnitude of any potential bias                                                   | Discussion (P16)                |
| Interpretation           | 20  | Give a cautious overall interpretation of results considering objectives, limitations, multiplicity of analyses, results from similar studies, and other relevant evidence                                   | Discussion (P13-16)             |
| Generalisability         | 21  | Discuss the generalisability (external validity) of the study results                                                                                                                                        | Discussion (P16)                |
| <b>Other information</b> |     |                                                                                                                                                                                                              |                                 |
| Funding                  | 22  | Give the source of funding and the role of the funders for the present study and, if applicable, for the original study on which the present article is based                                                | Funding information (P17)       |

\*Give information separately for exposed and unexposed groups.

**Note:** An Explanation and Elaboration article discusses each checklist item and gives methodological background and published examples of transparent reporting. The STROBE checklist is best used in conjunction with this article (freely available on the Web sites of PLoS Medicine at <http://www.plosmedicine.org/>, Annals of Internal Medicine at <http://www.annals.org/>, and Epidemiology at <http://www.epidem.com/>). Information on the STROBE Initiative is available at <http://www.strobe-statement.org>.

# BMJ Open

## Direct and indirect costs of families with a child with acute lymphoblastic leukemia in an academic hospital in China: a cross-sectional survey

|                                 |                                                                                                                                                                        |
|---------------------------------|------------------------------------------------------------------------------------------------------------------------------------------------------------------------|
| Journal:                        | <i>BMJ Open</i>                                                                                                                                                        |
| Manuscript ID                   | bmjopen-2019-030511.R2                                                                                                                                                 |
| Article Type:                   | Research                                                                                                                                                               |
| Date Submitted by the Author:   | 17-Jun-2019                                                                                                                                                            |
| Complete List of Authors:       | Ren, Yijiong; Shanghai Children's Medical Center, School of Medicine, Shanghai Jiao Tong University, China<br>Li, Xin; East China University of Science and Technology |
| <b>Primary Subject Heading</b>: | Health economics                                                                                                                                                       |
| Secondary Subject Heading:      | Oncology, Paediatrics                                                                                                                                                  |
| Keywords:                       | Child, Acute lymphoblastic leukemia, Family, China, Direct and indirect costs                                                                                          |
|                                 |                                                                                                                                                                        |

SCHOLARONE™  
Manuscripts

1  
2  
3 Direct and indirect costs of families with a child with acute lymphoblastic leukemia in an  
4  
5 academic hospital in China: a cross-sectional survey  
6

7 Yijiong Ren<sup>1†</sup>, PhD; Xin Li<sup>2\*†</sup>, PhD  
8  
9

10 <sup>1</sup>Shanghai Children's Medical Center, School of Medicine, Shanghai Jiao Tong University,  
11  
12 China  
13

14 <sup>2</sup>School of Social and Public Administration, East China University of Science and Technology  
15  
16

17  
18  
19 Address for Correspondence:  
20

21  
22 Xin Li, Ph.D.  
23 Room 111, 130 Meilong Rd  
24 School of Social and Public Administration  
25 East China University of Science and Technology  
26 Shanghai 200237, P. R. China  
27 Tel: 86-21-38762019  
28 Email: xinli@ecust.edu.cn  
29  
30  
31  
32  
33

34 <sup>†</sup>Drs Ren and Li contributed equally to this article.  
35  
36  
37  
38  
39  
40

41 Word count: 3518  
42  
43  
44  
45  
46  
47  
48  
49  
50  
51  
52  
53  
54  
55  
56  
57  
58  
59  
60

1  
2  
3 **Abstract:**  
4

5 **Objectives:** To estimate the direct and indirect costs in families with a child with acute  
6 lymphoblastic leukemia (ALL) in China.  
7

8  
9 **Design:** A single-site, cross-sectional survey of primary caregiver of a child with ALL was  
10 performed.  
11

12  
13 **Setting and participants:** We analyzed the total costs incurred upon the completion of the first  
14 three-phase treatment (induction, consolidation, and intensification), which requires intensive  
15 hospitalization. Eligible patients were: a) diagnosed with ALL between 2010 and 2012 at  
16 Shanghai Children's Medical Center (SCMC), b) 0-14 years at diagnosis, and c) completed the  
17 first three-phase treatment at SCMC. The data was collected between October 2014 and  
18 December 2014.  
19  
20  
21  
22  
23  
24  
25  
26  
27

28 **Outcome measures:** We decomposed the total costs into three categories (a) direct medical  
29 costs, which were further divided into outpatient and inpatient costs; (b) direct non-medical  
30 costs, which referred to expenses incurred in relation to the illness; and (c) indirect costs due to  
31 productivity loss.  
32  
33  
34  
35  
36

37 **Results:** A total of 161 patients were included in the study. Direct medical costs accounted for  
38 about 51.7% of the overall costs, and the rest of 48.3% of the total costs were attributed to direct  
39 non-medical costs and indirect costs. Regarding families with different household registration  
40 type (rural versus urban), the total costs were significantly different between the two groups  
41 (USD36125 vs. USD 25593;  $P = 0.021$ ). Specifically, urban families incurred significantly  
42 larger indirect costs than rural families (USD 12343 vs. USD 4157;  $P = 0.018$ ). Although the  
43 direct non-medical costs were not significantly different, urban families spent more money on  
44 hygiene cleaning products and auxiliary treatment equipment ( $P = 0.041$ ) and gifts and treats  
45 ( $P = 0.034$ ) than rural families.  
46  
47  
48  
49  
50  
51  
52  
53  
54  
55  
56  
57  
58  
59  
60

1  
2  
3 **Conclusions:** The financial burden faced by the Chinese families with a child with ALL was  
4 tremendous, and the distributions of costs among the three categories were different between  
5 urban and rural families.  
6  
7  
8  
9  
10  
11  
12  
13  
14  
15  
16  
17  
18  
19  
20  
21  
22  
23  
24  
25  
26  
27  
28  
29  
30  
31  
32  
33  
34  
35  
36  
37  
38  
39  
40  
41  
42  
43  
44  
45  
46  
47  
48  
49  
50  
51  
52  
53  
54  
55  
56  
57  
58  
59  
60

For peer review only

### Strengths and limitations of this study

- We estimated the direct and indirect costs in families with a child with acute lymphoblastic leukemia in China.
- We decomposed the estimates of the total costs into three categories: direct medical costs, direct non-medical costs and indirect costs due to productivity loss.
- Majority cost measures were based on parents' self-report and there might exist recall bias for some measures.

**Keywords:** Direct and indirect costs; Child; Acute lymphoblastic leukemia; Family; China

## Introduction

In China, the incidence of childhood cancer was 87.1 per million and the mortality was 36.3 per million in 2010<sup>1</sup>. Acute lymphoblastic leukemia (ALL) is the most common malignant disease among children, accounting for about 40% of all newly diagnosed childhood cancers<sup>1</sup>. The 5-year survival rate in childhood ALL has greatly increased over time and is now about 70% in China<sup>1</sup>. Regardless of better survival, life-saving therapy is costly and may result in a financial burden for these patients' families<sup>2-7</sup>. On the one hand, the costs of treatment of ALL and illness-related expenses are immense, on the other hand, parents may have to reduce their work hours, or give up paid work to care for their child resulting in loss of income.

Various studies have been conducted in developed countries to determine the costs associated with childhood cancer from a family perspective<sup>8</sup>. In these studies, the economic and financial impact of childhood cancer on families was examined on two primary cost categories: direct costs including the actual monetary expenditure related to the illness such as those associated with transport, food, accommodation, *etc.*<sup>3, 4, 9, 10</sup>, and indirect costs including the value of productivity loss such as cutting on work time, taking unpaid leave or quitting job<sup>4-7, 11-13</sup>. Although it is hard to make a precise comparison of the magnitude of the financial costs of families due to variation in study design, all studies reported substantial family financial burden associated with childhood cancer treatment. Specifically, two Canadian studies found that income loss due to work disruption and out-of-pocket expenses were estimated at over 30% of after-tax family income<sup>2, 6</sup>, and one American study reported that over 50% of the poorest families experienced annual income loss of more than 40%<sup>11</sup>.

While childhood cancer was shown to have an adverse economic consequence on families in developed countries, it is likely to have even more severe effects in developing countries. In

1  
2  
3 China, average treatment costs for childhood ALL were estimated to be between USD 15,128  
4 and USD 45,386<sup>14</sup>, whereas per capita income was USD 4270 in 2018. Although the Chinese  
5 government has made great efforts to provide universal health coverage by the year 2010, the  
6 coverage is typically shallow. 65.1% of childhood ALL patients' insurance covered less than  
7 50% of overall medical costs<sup>14</sup>.  
8  
9  
10  
11  
12  
13  
14  
15  
16

17 Unfortunately, medical costs are not the only financial burden faced by the Chinese families,  
18 the families with a child with ALL may also incur substantial additional costs associated with  
19 the illness. Specifically, there are huge differences in the allocation of medical resources  
20 between rural and urban areas, and among different provinces. High-quality medical resources  
21 are mainly distributed in large central cities such as Beijing, Shanghai, Guangzhou, *etc.*  
22 Therefore, families with a seriously ill child have to go to these cities to receive treatment for a  
23 better chance of survival. As a result, the corresponding non-medical out-of-pocket expenses  
24 may increase dramatically due to extra expenditures on transport, accommodation, *etc.* In  
25 addition, it is also hard for the parents to keep their jobs while taking care of the sick child,  
26 therefore resulting in loss of income.  
27  
28  
29  
30  
31  
32  
33  
34  
35  
36  
37  
38  
39  
40  
41

42 In addition to unequal distribution of medical resources, there are significant differences  
43 between urban and rural areas in terms of income and social security system in China. In 2018,  
44 urban per capita income was more than 2.5 times of rural per capita income (USD 5938 vs.  
45 USD 2211). Regarding the social security system, rural and urban populations are entitled to  
46 enroll in different health insurance schemes with different coverage plans, and unemployment  
47 and retirement insurances are only available to the urban working population. As a result, the  
48 economic burden is very likely to be different between rural and urban families.  
49  
50  
51  
52  
53  
54  
55  
56  
57  
58  
59  
60

1  
2  
3 As can be seen, the economic burden on Chinese families with a child with ALL could be  
4 devastated. Lacking financial aids from various sources may cause these families to fall from  
5 above to below the poverty line, or even give up treatment<sup>14</sup>. However, research on determining  
6 the costs associated with a childhood ALL is rare and the nature of these costs is poorly  
7 understood in developing countries<sup>15-18</sup>. It makes policy planning in the context of essential  
8 medicines, national fiscal policy towards childhood ALL and donor policy difficult without any  
9 reliable estimates of costs. The purpose of this paper was to estimate the economic burden in  
10 families with a child with ALL in China. In addition, we also reported the total costs and its  
11 three components for rural and urban families separately.  
12  
13  
14  
15  
16  
17  
18  
19  
20  
21  
22  
23  
24  
25

## 26 **Methods**

### 27 *Data and study population*

28  
29 The treatment of childhood ALL usually has four phases: induction, consolidation,  
30 intensification, and maintenance and lasts 2 to 3 years<sup>19</sup>. In the present paper, we estimated total  
31 costs incurred upon the completion of the first three-phase treatment (induction, consolidation,  
32 and intensification), which requires intensive hospitalization. Therefore, eligible patients were:  
33 a) diagnosed with ALL between 2010 and 2012 at Shanghai Children's Medical Center  
34 (SCMC), b) 0-14 years old at diagnosis, and c) completed the first three-phase treatment at  
35 SCMC. The data was collected between October 2014 and December 2014. The time between  
36 diagnosis and completion of the questionnaire was required to be greater than two years in order  
37 to capture parents' employment experiences throughout the treatment. Since quite a lot of the  
38 families were not living in Shanghai, face-to-face interviews were difficult to conduct. As an  
39 alternative, we conducted telephone interviews on the parents. Only one parent of the child,  
40 who self-identified as the major caregiver of the child answered the questionnaire. The  
41 interview lasted about 30-45 minutes. We obtained approval from the Institutional Review  
42  
43  
44  
45  
46  
47  
48  
49  
50  
51  
52  
53  
54  
55  
56  
57  
58  
59  
60

1  
2  
3 Board of Shanghai Children's Medical Center to conduct the study.  
4

### 5 *Pre-testing*

6  
7 In order to ensure the rationality and accuracy of the questionnaire, we pre-tested the  
8 questionnaire with 15 parents with a child with ALL who were randomly picked during their  
9 follow-up visits to the center. During this period, we revised the questionnaire many times to  
10 make sure that parents understood the questions, did not feel uncomfortable, and were aware  
11 of their costs reflecting the costs incurred during the induction, consolidation and intensification  
12 phases, not the costs associated with the maintenance therapy.  
13  
14  
15  
16  
17  
18  
19  
20  
21  
22  
23

### 24 *Measures*

25 We decomposed the costs into three categories (a) direct medical costs, which were further  
26 divided into outpatient and inpatient costs; (b) direct non-medical costs, which referred to  
27 expenses incurred in relation to the illness; and (c) indirect costs due to productivity loss.  
28  
29  
30  
31  
32  
33  
34

35 The questionnaire included three modules. The first module asked questions about socio-  
36 demographic characteristics of parents and their child. The second module included direct non-  
37 medical cost questions. The last module focused on indirect cost questions. More specifically,  
38 the details of these modules were shown as follows:  
39  
40  
41  
42  
43  
44  
45  
46

47 Demographic and socioeconomic variables: child age at diagnosis, child gender and whether  
48 child had health insurance, parent's age at diagnosis, the highest degree of parental education  
49 (elementary or lower, high/vocational school or lower, or college and above), family monthly  
50 income, family size, household registration type (Hukou types: rural versus urban), place of  
51 residence (Shanghai versus other provinces).  
52  
53  
54  
55  
56  
57  
58  
59  
60

1  
2  
3 Direct non-medical cost variables: direct non-medical costs included expenses related to illness  
4 during the period of the first three stages of treatment. Specifically, parent was asked to provide  
5 information on: a) expenses on accommodation per month including rent and utility fee; b)  
6 expenses on transportation; c) increased expenses on food and nutritional supplements per  
7 month; d) expenses on hygiene cleaning products and auxiliary treatment equipment, such as  
8 ultraviolet disinfection lamp, air purifier, humidifier, *etc.*; e) expenses on gifts and treats  
9 including electrical devices (e.g. computer, TV, video games *etc.*) and network fee.  
10  
11  
12  
13  
14  
15  
16  
17  
18  
19  
20

21 Indirect cost variables: indirect costs were the costs associated with lost productivity due to  
22 illness. In the present paper, parent was asked to provide information on employment status at  
23 diagnosis and during the treatment period, changes in role or hours worked since diagnosis and  
24 length of absence from work. Informant was also asked to complete this section for his or her  
25 partner. The indirect costs were measured by lost earnings using the human capital approach.  
26  
27  
28  
29  
30  
31  
32  
33  
34

35 Direct medical cost variables: The computerized database of medical costs at SCMC was  
36 established in 1998. The database strictly adheres to medical administration regulations.  
37 According to the administration system, all medicines and blood products should be supplied  
38 by the department of pharmacy and blood bank at SCMC. All lab tests and non-lab tests  
39 (including EEG, EKG, and various diagnostic imaging) should be done at SCMC as well. All  
40 outpatient and hospitalization costs were recorded according to their names/case numbers. In  
41 the present paper, overall outpatient and inpatient costs for each child with ALL between the  
42 confirmation of diagnosis at SCMC and the completion of the intensification therapy were  
43 collected from the database. The components of costs included costs for western medicine,  
44 Chinese medicine, blood products, lab tests, non-lab tests, hospital bed/daycare, consultant fees,  
45 using the nursing injection facility and consumption of materials and oxygen. In addition, the  
46  
47  
48  
49  
50  
51  
52  
53  
54  
55  
56  
57  
58  
59  
60

1  
2  
3 database also contained information on inpatient expenses paid by insurance for local patients.  
4  
5  
6

### 7 ***Patient and public involvement***

8  
9  
10 No patients were involved in the development of the research question, the outcome measures,  
11  
12 the design or implementation of the study. There are no plans about the dissemination of the  
13  
14 results.  
15  
16

### 17 ***Statistical Analysis***

18  
19  
20 All data were reviewed for completeness and relevance. Data were entered into Microsoft Excel  
21  
22 and imported into the STATA 13 statistical package (Stata Corporation, College Station, TX,  
23  
24 USA) for analysis. Descriptive statistics were used to describe the sample characteristics and  
25  
26 categorize the types and values of cost categories and items. The Chi-square tests and the *t* tests  
27  
28 were used for bivariate comparisons of categorical and continuous variables for the urban and  
29  
30 rural families, respectively. The amounts of all cost categories were projected to the estimates  
31  
32 that incurred during the treatment. We expressed all cost estimates in 2010 RMB by using the  
33  
34 Consumer Price Index and then converted in USD by using the average exchange rate between  
35  
36 RMB and USD in 2010 (USD 1.00 = RMB 6.7695). Total costs were then computed as the sum  
37  
38 of all cost categories for the sample. *T*-tests were used to examine the rural vs. urban differences  
39  
40 in all cost estimates. A two-tailed *p* value of 0.05 was considered statistically significant.  
41  
42  
43  
44  
45  
46  
47  
48

### 49 **Results**

50  
51 Medical expenses and parental contact information of a total of 171 patients were extracted  
52  
53 from the SCMC database. We contacted the 171 parents using the telephone numbers provided  
54  
55 in the database and 161 parents gave the consent before we conducted the interview. The 10  
56  
57 failed calls were due to either loss of contact or refuse to participate.  
58  
59  
60

1  
2  
3  
4  
5 Table 1 presents the child, parent, and family characteristics for the whole sample and for the  
6 urban and rural subsamples. The mean patient age at diagnosis was 4.9 years (standard  
7 deviation (SD) = 3.3 years; range: 0-14 years), the majority were male (58.4%). The average  
8 length of therapy (induction, consolidation, and intensification) was 11.6 months (SD = 9.6  
9 months). 52 patients (33.1%) did not have any insurance at the time of diagnosis. The mean age  
10 of parents at diagnosis was 33.2 years (SD = 4.3 years), the majority of the parents' highest  
11 education level was high/vocational school or below (61.9%). In terms of household  
12 characteristics, the average family size was 4.1 (SD = 1.1), 71 households (44.1%) had rural  
13 registration and only 33 households (20.6 %) were local residents (Shanghai). The average  
14 household monthly income at diagnosis was USD1232.25. Regarding urban and rural families,  
15 the highest education for parents in an urban area was significantly higher than that of parents  
16 from a rural area ( $P < 0.001$ ). In addition, urban families had smaller family size ( $P < 0.001$ ),  
17 higher monthly income ( $P = 0.02$ ) and were more likely to be local residents ( $P < 0.001$ ) than  
18 their rural counterparts.  
19  
20  
21  
22  
23  
24  
25  
26  
27  
28  
29  
30  
31  
32  
33  
34  
35  
36  
37  
38  
39

40 Table 2 describes the parents' employment statuses at the time of diagnosis and during the  
41 treatment period. On diagnosis, 35(22%) fathers worked in government, state-owned enterprise  
42 (SOE) or public sector, 109(68.6%) worked in private sector or self-employed, 11(6.9%) were  
43 farmers and 4(2.5%) were unemployed. During the treatment, 47 working fathers managed to  
44 keep their employment status unchanged, 13 completely stopped working, and 97 reported to  
45 take extended absences from work. The average length of absences was 14.4 months (SD =  
46 11.1 months). Regarding mothers, on diagnosis, 32(20.1%) worked in government, SOE or  
47 public sector, 73(45.9) worked in private sector or self-employed, 16(10.1%) were farmers and  
48 38(23.9%) were unemployed or doing housework. Among those who had a job, 14.8% did not  
49  
50  
51  
52  
53  
54  
55  
56  
57  
58  
59  
60

1  
2  
3 change their employment status, 6.6% stopped working, and the majority of working mothers  
4  
5 (78.7%) took extended absences from work. The average length of absences was 18.1 months  
6  
7 (SD = 10.8 months).  
8  
9

10  
11  
12 The three categories of the total costs and their components for the whole sample are given in  
13  
14 Table 3. Panel A reported that the average total medical costs during the treatment were USD  
15  
16 16307 (SD = 14488; interquartile range (IQR) 9441–18120). Medical costs were then divided  
17  
18 into two subcategories: outpatient and inpatient costs. The inpatient costs accounted for the  
19  
20 majority of the total medical costs (66.9%). Panel B of Table 3 presents the direct non-medical  
21  
22 costs incurred during the treatment. The average direct non-medical costs were USD 6441 (SD  
23  
24 = 5038; IQR 3013-8543) with the largest expenditure on accommodation. The average indirect  
25  
26 costs incurred during the treatment (Panel C of Table 3) were estimated to be USD 8733 (SD =  
27  
28 24321; IQR 0-6727). On average, the total costs for the whole sample were USD 31480 (SD =  
29  
30 31847; IQR 15518-33177). The direct medical costs accounted for more than half of the total  
31  
32 costs (51.8%), followed by indirect costs (27.7%) and direct non-medical costs (20.5%).  
33  
34  
35  
36  
37  
38  
39

40 Table 4 reports the total costs and their components for rural and urban families, respectively.  
41  
42 The total costs were significantly different between the two groups (mean: USD 36125 vs. USD  
43  
44 25592; P = 0.021). Regarding to the three cost categories, the urban families incurred  
45  
46 significantly larger indirect costs than the rural families (mean: USD 12343 vs. USD 4157; P =  
47  
48 0.018). Although the direct non-medical costs were not significantly different, the urban  
49  
50 families spent more money on hygiene cleaning products and auxiliary treatment equipment (P  
51  
52 = 0.041) and gifts and treats (P = 0.034) than the rural families.  
53  
54  
55  
56  
57

## 58 Discussion

59  
60

1  
2  
3 A cancer diagnosis in childhood can substantially affect the physical, psychosocial, and  
4 socioeconomic well-being of patients and their families. Yet, research on determining the costs  
5 associated with a childhood ALL is rare and the nature of these costs is poorly understood,  
6 especially in developing countries. The present study provides a breakdown of families' costs  
7 and resource use and an in-depth understanding of families' financial burden. We found that the  
8 financial burden faced by Chinese families with a child with ALL was tremendous. Among the  
9 three cost categories, direct medical costs accounted for about 51.8% of the overall costs, and  
10 the rest of 48.2% of the total costs were attributed to direct non-medical costs and indirect costs.  
11 Regarding families with different household registration type (rural versus urban), the  
12 distributions of costs among the three categories were different. Productivity loss contributed a  
13 much higher weight in total costs for urban families than for rural families. In addition, rural  
14 families spent most of their money on the treatment of ALL.

15  
16  
17  
18  
19  
20  
21  
22  
23  
24  
25  
26  
27  
28  
29  
30  
31  
32  
33 Our results showed that the average medical costs were approximately USD 16307, which were  
34 comparable to the findings from previous studies using data of developing countries<sup>14, 15, 20</sup>.  
35 Unlike most developed countries where costs of treatment are borne mainly by the public sector  
36 and health insurance<sup>4, 13</sup>, patients in developing countries have to bear a significant portion of  
37 direct medical costs<sup>16, 17</sup>. According to the health insurance regulations of China, if patient  
38 chooses to receive treatment in other province or city, or in non-designated hospital, the  
39 reimbursement rate could be very low or none at all. Although we were unable to determine  
40 this from our study directly, one report did have shown that the actual reimbursement rate was  
41 less than 50% for most of the rural families with a child with leukemia, of which around 27%  
42 of children only got 30% of reimbursement<sup>14</sup>. In addition, in the questionnaire we asked “any  
43 comments or suggestions on current insurance reimbursement policy?” more than half of the  
44 non-local parents (57.8%; data not shown) mentioned that the reimbursement rate was too low.  
45  
46  
47  
48  
49  
50  
51  
52  
53  
54  
55  
56  
57  
58  
59  
60

1  
2  
3 Specifically, they identified the low reimbursement mainly due to the following reasons: there  
4 existed a big gap on reimbursement rate between local and non-local residents; outpatient and  
5 imported medicines were not covered by the insurance, and the reimbursement procedure across  
6 provinces was tedious and time-consuming, and the actual reimbursement rate was low, so  
7 some parents chose to forgo reimbursement.  
8  
9  
10  
11  
12  
13  
14  
15  
16

17 In contrast to the previous literature which found that transport took a significant portion of  
18 family financial cost<sup>9, 10, 21</sup>, our results showed that transport only contributed to 2.7% of the  
19 total direct non-medical costs, whereas around 45% of the total direct non-medical expenses  
20 were spent on accommodation. That was because most of the non-local families chose to rent  
21 near the hospital, which saved travel costs. Although the very poor families can receive 30 days  
22 of accommodation at the center at very low price<sup>15</sup>, space is limited and the 30-day rental period  
23 is far from enough. Most non-local families had to rent a room or an apartment near the hospital  
24 for about USD146.02-USD730.09 per month for an average 12 months. Food and nutritional  
25 supplements accounted for about 35% of the total direct non-medical cost. As described by  
26 Tsimicalis et al. (2013), increased expenses on food were to accommodate the child's  
27 fluctuating weight, satisfy food cravings, taste alterations, *etc.*<sup>10</sup>.  
28  
29  
30  
31  
32  
33  
34  
35  
36  
37  
38  
39  
40  
41  
42  
43  
44

45 Following diagnosis, 85% of working mothers and 70% of working fathers gave up all paid  
46 employment or took unpaid extended leaves in our sample. These numbers were much higher  
47 than those reported in the previous studies<sup>4, 6, 12, 13</sup>. The possible explanation was that in our  
48 sample, the majority families were from other provinces (79%), and it was hard for only one  
49 parent to handle all the issues related to treatment, accommodation, food, *etc.*, therefore, both  
50 parents had to quit their jobs or took unpaid leaves during the treatment.  
51  
52  
53  
54  
55  
56  
57  
58  
59  
60

1  
2  
3 Our data indicated that families with high socio-economic status were more likely to receive  
4 treatment in high-quality medical facilities. Specifically, according to data from the National  
5 Bureau of Statistics of China, in 2010, the annual urban per capita income was USD 2822.87,  
6 and the amount was RMB874.36 in the rural areas<sup>22</sup>. However, our data indicated that the  
7 sample urban per capita income was 1.9\* times that of the national urban average and the ratio  
8 became 2.4 times for the rural per capita income. In addition, our data showed that the total  
9 costs were 1.79 times of the sample urban family's annual income, and were 2.72 times of the  
10 sample rural family's annual income. This finding indicated that even for these high socio-  
11 economic families, the economic burden of childhood ALL was huge, especially for rural  
12 families.  
13  
14  
15  
16  
17  
18  
19  
20  
21  
22  
23  
24  
25  
26  
27  
28

29 Our findings have very important policy implications. First, policymakers should make effort  
30 on simplifying the reimbursement procedure across provinces and eliminating the huge  
31 disparities in reimbursement ratio across regions; second, our sample indicated 33% of patients  
32 did not have any insurance at diagnosis, although we did not have direct data on why these  
33 parents chose not to purchase insurance for their child, previous study has shown that lack of  
34 knowledge or the concept of insurance could be a major barrier for people from participating  
35 the insurance program<sup>23</sup>, therefore, the government should work hard on educating people  
36 regarding the different programs; third, patients with cancer and their families may need  
37 ongoing financial management with a designated financial advisor well beyond the initial  
38 treatment phase to help them manage debt, access resources to cope with direct and indirect  
39 costs of cancer treatment and maintain patients' and families' financial capacity later in life.  
40  
41  
42  
43  
44  
45  
46  
47  
48  
49  
50  
51  
52  
53  
54  
55

---

56  
57 \*Sample annual urban per capita income was calculated as: urban household monthly income\*12/family  
58 size, using the data from Table 1.  
59  
60

1  
2  
3  
4  
5 There are limitations to this study. First, majority measures were based on parents' self-report,  
6  
7 and there may exist recall bias for some measures. However, to minimize recall bias, before  
8  
9 conducting a formal interview, we contacted them one week in advance and asked parents to  
10  
11 recall and list out the details of all the expenses during the treatment. After the interview, we  
12  
13 double checked data. If there was inconsistency in the data, we called back to clarify. Second,  
14  
15 while the generalizability of this study may be somewhat limited as we focused on one hospital,  
16  
17 SCMC, as one of the primary pediatric tertiary care centers in China, it provides treatment of  
18  
19 severe disease in children around China (Our data showed that 79% of patients were non-local  
20  
21 residents). Therefore, our results are likely applicable to other geographic areas. Third, our  
22  
23 sample included the families who were relatively rich compare with the national average, which  
24  
25 limited our ability to assess the financial impact among the families with low socio-economic  
26  
27 status.  
28  
29  
30  
31  
32  
33  
34

35 Families of children with ALL experience a wide range of costs. An ongoing investigation of  
36  
37 families' costs will yield a rich understanding of the disease costs, formulate the basis of cost  
38  
39 assessments, and lend insight into practice and policy changes aimed at lessening the economic  
40  
41 impact of this burden.  
42  
43  
44  
45  
46  
47  
48  
49  
50  
51  
52  
53  
54  
55  
56  
57  
58  
59  
60

### **Contribution Statement**

YR and XL designed the study, developed a data analysis plan and equally contributed to this study. XL performed a statistical analysis of the data. All authors made significant contributions to the interpretation of results and participated in drafting and revising the manuscript. All authors have approved the final version.

### **Competing Interests**

None.

### **Ethics approval**

This study was approved by the Institutional Review Board of Shanghai Children's Medical Center.

### **Funding**

This work was supported by the Fundamental Research Funds for the Central Universities of China (Grant No. 17JCYA03).

### **Data Sharing Statement**

Data are not available because the authors promised the SCMC that the information was only used for research, and it would not be disclosed.

## References

1. Zheng R, Peng X, Zeng H, etc. Incidence, mortality and survival of childhood cancer in China during 2000 – 2010 period: A population-based study. *Cancer Letter*, 2015; 363(2): 176-180.
2. Barr R, Furlong W, Horsman J, etc. The monetary costs of children cancer to the families of patients. *International Journal of Oncology*, 1996; 8: 933-940.
3. Dockerty JD, Skegg DC, Williams SM. Economic effects of childhood cancer on families. *Journal of Pediatrics and Child Health*, 2003; 39:254-258.
4. Eiser C, Upton P. Costs of Caring for a Child with Cancer: A Questionnaire Survey. *Child: Health and Development*, 2007; 33(4): 455-459.
5. Dussel V, Bona K, Heath JA, etc. Unmeasured costs of a child's death: Perceive financial burden, work disruptions, and economic coping strategies used by American and Australian families who lost children to cancer. *Journal of Clinical Oncology*, 2011; 29:1007-1013.
6. Tsimicalis A, Stevens B, Ungar WJ, etc. A prospective study to determine the costs incurred by families of children newly diagnosed with cancer in Ontario. *Psychooncology* 2012; 21:1113-1123.
7. Warner EL, Kirchhoff AC, Nam GE, et al. Financial Burden of Pediatric Cancer for Patients and Their Families. *Journal of Oncology Practice*, 2015; 11: 12-18.
8. Pelletier W, Bona K. Assessment of Financial Burden as a Standard of Care in Pediatric Oncology. *Pediatric Blood and Cancer*, 2015; 62: S619-S631.
9. Cohn RJ, Goodenough B, Foreman T, Suneson J. Hidden financial costs in treatment for childhood cancer: An Australian study of lifestyle implications for families absorbing out-of-pocket expenses. *Journal of Pediatric Hematology/Oncology*, 2003; 25:854-863.
10. Tsimicalis A, Stevens B, Ungar W, et al. A Mixed Method Approach to Describe the Out-

- 1  
2  
3 of-Pocket Expenses Incurred by Families of Children with Cancer. *Pediatric Blood and*  
4  
5 *Cancer*, 2013; 60: 438-445.  
6  
7  
8 11. Bona K, Dussel V, Orellana L, etc. Economic impact of advanced pediatric cancer on  
9  
10 families. *Journal of Pain and Symptom Management*, 2014; 47:594-603.  
11  
12 12. Fluchel MN, Kirchhoff AC, Bodson J, etc. Feograph and the burden of care in pediatric  
13  
14 cancers. *Pediatric Blood and Cancer*, 2014; 61:1918-1924.  
15  
16 13. Limburg H, Shaw Ak, McBride ML. Impact of childhood cancer on parental employment  
17  
18 and sources of income: a Canadian pilot study. *Pediatric Blood and Cancer*, 2008; 51:93-  
19  
20 98.  
21  
22 14. Red Cross Report. A report on the living conditions of children diagnosed with leukemia  
23  
24 in rural China. 2013 (in Chinese). Available at:  
25  
26 <https://wenku.baidu.com/view/7004a99b4afe04a1b071dec5.html>.  
27  
28  
29 15. Liu Y, Chen J, Tang JY, et al. Cost of Childhood Acute Lymphoblastic Leukemia Care in  
30  
31 Shanghai, China. *Pediatric Blood and Cancer*, 2009; 53: 557-562.  
32  
33 16. Islam A, Akhter A, Eden T. Cost of Treatment for Children with Acute Lymphoblastic  
34  
35 Leukemia in Bangladesh. *Journal of Cancer Policy*, 2015; 6: 37-43.  
36  
37 17. Ghatak N, Trehan A, Bansal D. Financial Burden of Therapy in Families with a Child with  
38  
39 Acute Lymphoblastic Leukemia: Report from North India. *Supportive Care in Cancer*,  
40  
41 2016; 24: 103-108.  
42  
43 18. Wang J, Shen N, Zhang X, et al. Care Burden and its Predictive Factors in Parents of Newly  
44  
45 Diagnosed Children with Acute Lymphoblastic Leukemia in Academic Hospitals in China.  
46  
47 *Supportive Care in Cancer*, 2017; 25: 3703-3713.  
48  
49 19. Seibel N. Treatment of acute lymphoblastic leukemia in children and adolescents: Peaks  
50  
51 and pitfalls. *Hematology*, 2008; 1:374-380.  
52  
53  
54  
55  
56  
57  
58  
59  
60

- 1  
2  
3 20. Bhakta, N, Martiniuk, ALC, Gupta, S, et. al. The cost effectiveness of treating paediatric  
4 cancer in low-income and middle-income countries: a case-study approach using acute  
5 lymphocytic leukaemia in Brazil and Burkitt lymphoma in Malawi. Archives of Disease  
6 in Childhood, 2013; 98(2): 155-160.  
7  
8  
9  
10  
11  
12 21. Miedema B, Easley J, Fortin P, et al. The economic impact on families when a child is  
13 diagnosed with cancer. Current Oncology, 2008; 15:93-98.  
14  
15  
16 22. National Bureau of Statistics of China. 2011. Data available at:  
17 <http://www.stats.gov.cn/tjsj/ndsj/2011/indexch.htm>.  
18  
19  
20  
21 23. Li, X and Zhang, W. The impacts of health insurance on health care utilization among the  
22 elderly in China. Social Science & Medicine, 2013; 85:59-65.  
23  
24  
25  
26  
27  
28  
29  
30  
31  
32  
33  
34  
35  
36  
37  
38  
39  
40  
41  
42  
43  
44  
45  
46  
47  
48  
49  
50  
51  
52  
53  
54  
55  
56  
57  
58  
59  
60

Table 1. Child, parent, and family characteristics (n=161)

| Characteristics                                      | Total (N=161) |           | Urban (N=90) |           | Rural (N=71) |           | P-value |
|------------------------------------------------------|---------------|-----------|--------------|-----------|--------------|-----------|---------|
|                                                      | N             | %         | N            | %         | N            | %         |         |
| <b>Child characteristics</b>                         |               |           |              |           |              |           |         |
| Age at diagnosis, years (mean, SD)                   | 4.9           | (3.3)     | 4.7          | (3.2)     | 5.1          | (3.3)     | 0.48    |
| Average treatment period, months (mean, SD)          | 11.6          | (9.6)     | 12.4         | (10.4)    | 10.6         | (8.5)     | 0.25    |
| Gender                                               |               |           |              |           |              |           |         |
| Male                                                 | 94            | 58.4      | 54           | 60.0      | 40           | 56.3      | 0.64    |
| Female                                               | 67            | 41.6      | 36           | 40.0      | 31           | 43.7      |         |
| No Health insurance                                  | 52            | 33.1      | 32           | 35.5      | 20           | 28.1      | 0.33    |
| <b>Parent characteristics</b>                        |               |           |              |           |              |           |         |
| Age at diagnosis, years (mean, SD)                   | 33.2          | (4.3)     | 33.6         | (4.4)     | 32.8         | (4.7)     | 0.34    |
| Education (the highest degree of parental education) |               |           |              |           |              |           |         |
| Middle school or lower                               | 67            | 41.9      | 18           | 20.0      | 50           | 70.4      | <0.001  |
| High/vocational school                               | 32            | 20.0      | 17           | 18.9      | 15           | 21.1      |         |
| College or above                                     | 61            | 38.1      | 55           | 61.1      | 6            | 8.5       |         |
| <b>Household characteristics</b>                     |               |           |              |           |              |           |         |
| Family size (mean, SD)                               | 4.1           | (1.1)     | 3.8          | (0.9)     | 4.5          | (1.1)     | <0.001  |
| Household monthly income, USD (mean, SD)             | 1287.31       | (2518.36) | 1681.56      | (3082.12) | 783.35       | (1379.65) | 0.02    |
| Area of residence                                    |               |           |              |           |              |           |         |
| Shanghai                                             | 33            | 20.6      | 30           | 33.3      | 3            | 4.2       | <0.001  |
| Other provinces                                      | 128           | 79.4      | 60           | 66.7      | 68           | 95.8      |         |

Table 2. Employment status of parents

| Characteristics                                                                      | N      | %    | N      | %    |
|--------------------------------------------------------------------------------------|--------|------|--------|------|
| <b><i>Employment at diagnosis</i></b>                                                | Father |      | Mother |      |
| Government, SOE, or Public sector                                                    | 35     | 22.0 | 32     | 20.1 |
| Private sector or self-employed                                                      | 109    | 68.6 | 73     | 45.9 |
| Agriculture                                                                          | 11     | 6.9  | 16     | 10.1 |
| Unemployed or doing housework                                                        | 4      | 2.5  | 38     | 23.9 |
| <b><i>Change of employment status<br/>(conditional on employed at diagnosis)</i></b> | Father |      | Mother |      |
| No change                                                                            | 47     | 29.9 | 18     | 14.8 |
| Completely stop working                                                              | 13     | 8.3  | 8      | 6.6  |
| Extended leave                                                                       | 97     | 61.7 | 96     | 78.7 |
| Average length of absence,<br>months (mean, SD)                                      | 14.4   | 11.1 | 18.1   | 10.8 |

Table 3. Total cost and its components (in 2010 US\$)\*

|                                                             | Total sample (n = 161) |              |       |       |      |
|-------------------------------------------------------------|------------------------|--------------|-------|-------|------|
|                                                             | Median                 | IQR          | Mean  | SD    | %    |
| <b><i>Panel A: Total direct medical costs</i></b>           | 12562                  | 9441 - 18120 | 16307 | 14488 |      |
| Inpatient cost                                              | 7064                   | 5097 - 11786 | 7622  | 18645 | 66.9 |
| Outpatient cost                                             | 5272                   | 3391 - 6712  | 7031  | 6843  | 33.1 |
| <b><i>Panel B: Total direct non-medical costs</i></b>       | 5220                   | 3013 - 8543  | 6441  | 5038  |      |
| Accommodation                                               | 2158                   | 280 - 3700   | 2898  | 3357  | 45.0 |
| Transportation                                              | 112                    | 44 - 219     | 175   | 219   | 2.7  |
| Food and nutritional supplements                            | 1682                   | 392 - 2864   | 2289  | 2743  | 35.5 |
| Hygiene cleaning products and auxiliary treatment equipment | 177                    | 59 - 505     | 429   | 651   | 6.7  |
| Gifts and treats including electrical devices               | 428                    | 123 - 841    | 651   | 888   | 10.1 |
| <b><i>Panel C: Total indirect costs</i></b>                 | 1677                   | 0 - 6727     | 8733  | 24321 |      |
| <b><i>Total costs</i></b>                                   | 22702                  | 15518-33177  | 31480 | 31847 |      |

\*The average exchange rate between RMB and USD in 2010 is 6.7695.

Table 4. Costs of different categories during the treatment (in 2010 USD)\*

|                                                             | Urban sample (n =90) |               |       |       |      | Rural sample (n = 71) |               |       |       |      | P-Value** |
|-------------------------------------------------------------|----------------------|---------------|-------|-------|------|-----------------------|---------------|-------|-------|------|-----------|
|                                                             | Median               | IQR           | Mean  | SD    | %    | Median                | IQR           | Mean  | SD    | %    |           |
| <b>Panel A: Total direct medical costs</b>                  | 11820                | 8680 - 17158  | 17075 | 17854 |      | 12857                 | 9939 - 18660  | 15332 | 8531  |      | 0.393     |
| Inpatient cost                                              | 7064                 | 5018 - 11458  | 12048 | 15571 | 70.6 | 6894                  | 5157 - 11786  | 9475  | 7176  | 61.7 | 0.155     |
| Outpatient cost                                             | 4735                 | 2803 - 6375   | 5027  | 3383  | 29.4 | 5634                  | 4495 - 6843   | 5858  | 2321  | 38.3 | 0.074     |
| <b>Panel B: Total direct non-medical costs</b>              | 5343                 | 2873 - 9447   | 6707  | 5535  |      | 5204                  | 3443 - 7265   | 6104  | 4342  |      | 0.468     |
| Accommodation                                               | 1752                 | 0 - 3900      | 2830  | 3880  | 42.2 | 2568                  | 1430 - 3676   | 2983  | 2569  | 48.9 | 0.727     |
| Transportation                                              | 137                  | 30 - 280      | 189   | 207   | 2.8  | 109                   | 56 - 178      | 156   | 233   | 2.6  | 0.376     |
| Food and nutritional supplements                            | 1773                 | 221 - 3418    | 2392  | 2849  | 35.7 | 1472                  | 463 - 2482    | 2158  | 2618  | 35.4 | 0.597     |
| Hygiene cleaning products and auxiliary treatment equipment | 281                  | 74 - 675      | 520   | 706   | 7.8  | 103                   | 36 - 278      | 313   | 556   | 5.1  | 0.041     |
| Gifts and treats including electrical devices               | 519                  | 147 - 981     | 774   | 1067  | 11.5 | 328                   | 70 - 701      | 494   | 558   | 8.1  | 0.034     |
| <b>Panel C: Total indirect costs</b>                        | 463                  | 0 - 7379      | 12343 | 31598 |      | 1822                  | 44 - 6391     | 4157  | 6677  |      | 0.018     |
| <b>Total costs</b>                                          | 22154                | 14036 - 41289 | 36125 | 40487 |      | 22860                 | 16065 - 30601 | 25593 | 13088 |      | 0.021     |

\* The average exchange rate between RMB and USD in 2010 is 6.7695.

\*\* P value for *t* test comparing means between rural and urban samples.

# Questionnaire on Family Financial Burden of Child with Acute Lymphoblastic Leukemia

## A、 Family Background Information

1. Your date of birth (solar calendar): \_\_\_\_\_. You are the child's (a) father (b) mother.
2. Your place of residence (province): \_\_\_\_\_, your current HuKou location: \_\_\_\_\_, your current Hukou status: (a) rural (b) urban
3. Date of birth of your spouse (solar calendar): \_\_\_\_\_, your spouse's place of residence (province): \_\_\_\_\_, your spouse's current Hukou location: \_\_\_\_\_, your spouse's current Hukou status: (a) rural (b) urban
4. Place of residence of your child (province) : \_\_\_\_\_, your child's current Hukou location: \_\_\_\_\_, your child's current Hukou status: (a) rural (b) urban
5. Does your child live with his or her parents? (a) Yes (b) No
6. Prior to the child illness, your child's education level was :(a) not in school (b) in kindergarten (c) in primary school (d) in junior high school
7. Prior to the child illness, your family had a total of \_\_\_\_\_ people, including \_\_\_\_\_ people with income. After the child fell ill, did your family have new-born child? (a) Yes (b) No
8. Your education level: (a) no formal education (illiterate) (b) primary school or below (c) junior high school or below (d) the high school/technical school (e) college/university (f) master degree or above
9. Education level of your spouse: (a) no formal education (illiterate) (b) primary school or below (c) junior high school or below (d) the high school/technical school (e) college/university (f) master degree or above
10. Prior to the child illness, your average monthly income was \_\_\_\_\_RMB, your

spouse's average monthly income was \_\_\_\_\_RMB, and your family's average annual income was \_\_\_\_\_RMB.

11. Did you own your current residence prior to the child illness? (a) Yes (b) No
12. Did your family belong to low income family prior to the child illness? (a) Yes (b) No
13. Did you purchase social medical insurance for your child before his/her illness? (a) Yes (b) No
- If yes, the insurance purchased was: (a) Urban Resident Basic Medical Insurance (b) Children's Hospitalization Fund (c) New Rural Cooperative Medical Insurance (d) others
- If no, after the child fell ill, did you child enroll in social medical insurance? The enrolled social medical treatment insurance was \_\_\_\_\_(fill one list in Q13).
14. Did you receive medical assistance for your child after the child became ill? (a) Yes (b) No
15. Did you purchase commercial health insurance for your child before the child became ill? (a) Yes (b) No
- If yes, how many commercial health insurances you purchased for your child: (a)1 (b)2 (c) more than 2

## **B、 Family Financial Burden**

### **B.1 Direct Medical Costs**

1. The date of your child's diagnosis at the Children's Medical Center was \_\_\_\_\_, The completion date of the first three-phase treatment in the Children's Medical Center was \_\_\_\_\_
2. During the first three-phase treatment, the total medical costs paid to the Children's Medical Center were \_\_\_\_\_ RMB, to other medical institutions were \_\_\_\_\_RMB, including:
- (a) medical insurance paid: \_\_\_\_\_ RMB, among them, the commercial medical insurance paid: \_\_\_\_\_ RMB.

(b) medical assistance (including funded by the Children's Medical Center): \_\_\_\_\_ RMB.

3. During the first three-phase treatment, the costs that your family paid for purchasing the medicines from other medical institutions were about \_\_\_\_\_RMB.

## B.2 Direct Non-medical Costs

4. During the treatment, your family's average monthly costs on food were \_\_\_\_\_RMB. Compared with the costs before child's illness, the increased average monthly costs on food were \_\_\_\_\_ RMB.

5. Did your family purchase large electronic products (such as computer, video games, television, refrigerator, etc.) for your child during his or her treatment? (a)Yes (b) No

If yes, the costs were \_\_\_\_\_RMB. Among them, computer: \_\_\_\_\_RMB, video games: \_\_\_\_\_RMB, television: \_\_\_\_\_RMB, refrigerators: \_\_\_\_\_RMB, others: \_\_\_\_\_RMB.

6. Did your family buy toys for your child during the treatment? (a)Yes (b) No

If yes, the costs were \_\_\_\_\_RMB. Compared with the costs before child illness, the new toy purchase expenses were \_\_\_\_\_RMB.

7. Your family spent an average of \_\_\_\_\_RMB on communications per month during the child's treatment. The increased average monthly communication fee was \_\_\_\_\_RMB, compared with fee before child illness. If you registered for online service for your child, the total costs of the Internet were \_\_\_\_\_RMB.

8. During the treatment of child, your average monthly costs on purchasing hygiene cleaning products and related materials were \_\_\_\_\_RMB. The costs of purchasing auxiliary treatment facilities (e.g., ultraviolet disinfection lamp, air purifier, humidifier, etc.) were \_\_\_\_\_RMB.

**[If you do not live in Shanghai, please answer question 9. If you live in Shanghai, please answer question 10.]**

9. If you do not live in Shanghai, what kind of transportation did you and your family usually take to and from the Children's Medical Center during your child's treatment? (a) train (b) coach (c) plane (d) others \_\_\_\_\_

1  
2  
3  
4 You and your family traveled to Children's Medical Center altogether \_\_\_\_ times.  
5  
6 The average costs per person on transportation were \_\_\_\_\_RMB. The total costs  
7  
8 of transportation were \_\_\_\_\_RMB.

- 9  
10 10. If you live in Shanghai, what kind of transportation did you and your family  
11  
12 usually take to and from the Children's Medical Center during your child's  
13  
14 treatment? (a) taxi (b) family car (c) others

15  
16 On average, you and your family commuted from home to Children's Medical  
17  
18 Center \_\_\_\_ times each month. Every time the transportation costs  
19  
20 were \_\_\_\_\_RMB. The total costs of transportation were \_\_\_\_\_RMB. (If using  
21  
22 family car, please estimate the costs of fuel, tolls and parking fees, *etc.*)

- 23  
24 11. Did you rent an apartment near the hospital for the convenience of your family  
25  
26 during your child's hospitalization? (a) Yes (b) No.

27  
28 If yes, the agency fee was \_\_\_\_\_RMB. The average monthly rent was \_\_\_\_  
29  
30 RMB. The average monthly payment for utility was \_\_\_\_\_RMB. You rent for a  
31  
32 total of \_\_\_\_\_ months.

- 33  
34 12. Did you hire a day laborer while your child was hospitalized? (a) Yes (b) No

35  
36 If yes, you total hired \_\_\_\_\_ months. Day laborer worked \_\_\_\_\_ hours a day;  
37  
38 hour salary was \_\_\_\_\_RMB; day laborer worked \_\_\_\_\_ days per month.

### 41 **B.3 Indirect Costs**

- 42  
43 13. Before the child fell ill, what was the type of your work unit: (a) government  
44  
45 agency (b) State-owned enterprises (including state-owned holding enterprises)  
46  
47 (c) Private enterprise (d) Overseas-invested enterprises, foreign-funded  
48  
49 enterprises or foreign-invested enterprises (e) public institution (f) Individual  
50  
51 household or freelancer (g) farmer (h) Unemployed

52  
53 **[If question 13 you chose (a)-(e), please answer question 14; If (f)-(h), please**  
54  
55 **answer question 15.]**

- 56  
57 14. What change did your employment situation have during your child's treatment?  
58  
59 (a) unchanged (b) discontinuation of work (c) short-term leave (d) long-term  
60

1  
2  
3  
4 leave (including irregular leave) (e) others\_\_\_\_\_

5 If (c), the average monthly salary or work income decreased by\_\_\_\_\_%.

6  
7 If (d), the length of absence from work was\_\_\_\_\_months. The average monthly  
8 salary or work income decreased by\_\_\_\_\_%

9  
10  
11 15. What change did your employment situation have during your child's treatment?

12 (a) unchanged (b) discontinuation of work (c) reduction of workload (d) others\_\_

13  
14 If (b), you stop working altogether \_\_\_\_\_months, the average yearly income  
15 decreased by\_\_\_\_\_%.

16  
17 If (c), due to the reduction of workload, the average yearly income decreased  
18 by\_\_\_\_\_%.

19  
20 16. Before the child fell ill, what was the type of your spouse work unit: (a)  
21 government agency (b) State-owned enterprises (including state-owned holding  
22 enterprises) (c) Private enterprise (d) Overseas-invested enterprises, foreign-  
23 funded enterprises or foreign-invested enterprises (e) public institution (f)  
24 Individual household or freelancer (g) farmer (h) Unemployed

25  
26  
27  
28  
29  
30  
31  
32  
33 **[If question 16 you chose (a)-(e), please answer question 17. If (f)-(h), please**  
34 **answer question 18.]**

35  
36  
37 17. What change did your spouse's employment situation have during your child's  
38 treatment? (a) unchanged (b) discontinuation of work (c) short-term leave (d)  
39 long-term leave (including irregular leave) (e) others

40  
41 If (c), the average monthly salary or work income decreased by\_\_\_\_\_%.

42  
43 If (d), the length of absence from work was\_\_\_\_\_months. The average monthly  
44 salary or work income decreased by\_\_\_\_\_%

45  
46  
47 18. What change did your spouse's employment situation have during your child's  
48 treatment?

49 (a) unchanged (b) discontinuation of work (c) reduction of workload (d) others

50  
51 If (b), your spouse stop working altogether \_\_\_\_\_months, the average yearly  
52 income decreased by \_\_\_\_\_%.

53  
54 If (c), due to the reduction of workload, the average yearly income decreased by  
55 \_\_\_\_\_%.

- 1  
2  
3  
4 19. During the first three-phase treatment, was there other relative besides you and  
5 your spouse caring for the child? (a) Yes (b) No  
6  
7 If yes, \_\_\_\_\_(who) cared for the child, he or she cared for \_\_\_\_ months. His or  
8 her work unit was \_\_\_\_\_ (no work, please fill “no”). The average monthly  
9 income loss for caring child was \_\_\_\_\_RMB.  
10  
11  
12  
13 20. During the first three-phase treatment, did you hire a full-time staff besides your  
14 family to accompany your child? (a) Yes (b) No.  
15  
16 If yes, she or he escorted for a total of \_\_\_\_\_months, earning \_\_\_\_\_RMB.  
17  
18  
19 21. During the first three-phase treatment, other large non-medical expenses that your  
20 family incurred for your child included \_\_\_\_\_. The average expenditure  
21 increased \_\_\_\_\_RMB per month.  
22  
23  
24  
25  
26  
27

#### 28 **B.4 Other Information**

- 29  
30 1. (Just ask parents with rural Hukou) Before you decided to go to Children’s Medical  
31 Center for treatment, were you and your spouse aware of the new policy announced  
32 by the National Ministry of Health in early 2011 concerning that children's  
33 leukemia would be reimbursed by the new rural cooperative medical system  
34 (NCMS) for 70%, and the Serious Disease Relief Fund would give 20%  
35 compensation according to the family situation? (a) Yes (b) No  
36  
37  
38  
39  
40  
41  
42 2. In terms of medical expenses, reimbursement and concern and other aspects for  
43 children’s leukemia, do you have any suggestions or appeals to hospital, Health  
44 Administrative Department, Medical Insurance Department and other relevant  
45 government departments?  
46  
47  
48  
49  
50 \_\_\_\_\_  
51  
52 \_\_\_\_\_  
53  
54 3. If we still have questions regarding the questions in the questionnaire, or we want  
55 to know more about your family's financial burden and pressure in the future, can  
56 we contact you directly for further inquiry? (1) Yes (2) No  
57  
58

59 Your mobile phone number: \_\_\_\_\_ Signature of parents: \_\_\_\_\_  
60

1  
2  
3  
4  
5  
6  
7  
8  
9  
10  
11  
12  
13  
14  
15  
16  
17  
18  
19  
20  
21  
22  
23  
24  
25  
26  
27  
28  
29  
30  
31  
32  
33  
34  
35  
36  
37  
38  
39  
40  
41  
42  
43  
44  
45  
46  
47  
48  
49  
50  
51  
52  
53  
54  
55  
56  
57  
58  
59  
60

\*\*\*\*\*

**The researcher's comprehensive evaluation of the quality of this questionnaire is:**

**(1) high (2) medium (3) low**

\*\*\*\*\*

Signature of interviewer: \_\_\_\_\_

Date of signature : \_\_\_\_\_

For peer review only

STROBE Statement—Checklist of items that should be included in reports of *cohort studies*

|                          | Item No | Recommendation                                                                                                                                                                                    | Section and page number (P)      |
|--------------------------|---------|---------------------------------------------------------------------------------------------------------------------------------------------------------------------------------------------------|----------------------------------|
| Title and abstract       | 1       | (a) Indicate the study's design with a commonly used term in the title or the abstract                                                                                                            | Title page (P1)<br>Abstract (P2) |
|                          |         | (b) Provide in the abstract an informative and balanced summary of what was done and what was found                                                                                               | Abstract (P2–3)                  |
| <b>Introduction</b>      |         |                                                                                                                                                                                                   |                                  |
| Background/rationale     | 2       | Explain the scientific background and rationale for the investigation being reported                                                                                                              | Introduction (P4–6)              |
| Objectives               | 3       | State specific objectives, including any prespecified hypotheses                                                                                                                                  | Introduction (P7)                |
| <b>Methods</b>           |         |                                                                                                                                                                                                   |                                  |
| Study design             | 4       | Present key elements of study design early in the paper                                                                                                                                           | Methods (P7)                     |
| Setting                  | 5       | Describe the setting, locations, and relevant dates, including periods of recruitment, exposure, follow-up, and data collection                                                                   | Methods (P7–8)                   |
| Participants             | 6       | (a) Give the eligibility criteria, and the sources and methods of selection of participants. Describe methods of follow-up                                                                        | Methods (P7–8)                   |
|                          |         | (b) For matched studies, give matching criteria and number of exposed and unexposed                                                                                                               | N/A                              |
| Variables                | 7       | Clearly define all outcomes, exposures, predictors, potential confounders, and effect modifiers. Give diagnostic criteria, if applicable                                                          | Methods (P8)                     |
| Data sources/measurement | 8*      | For each variable of interest, give sources of data and details of methods of assessment (measurement). Describe comparability of assessment methods if there is more than one group              | Methods (P8–10)                  |
| Bias                     | 9       | Describe any efforts to address potential sources of bias                                                                                                                                         | Methods (P8)<br>Discussion (P16) |
| Study size               | 10      | Explain how the study size was arrived at                                                                                                                                                         | Results (P10–11)                 |
| Quantitative variables   | 11      | Explain how quantitative variables were handled in the analyses. If applicable, describe which groupings were chosen and why                                                                      | Methods (P10)                    |
| Statistical methods      | 12      | (a) Describe all statistical methods, including those used to control for confounding                                                                                                             | Methods (P10)                    |
|                          |         | (b) Describe any methods used to examine subgroups and interactions                                                                                                                               | Methods (P10)                    |
|                          |         | (c) Explain how missing data were addressed                                                                                                                                                       | N/A                              |
|                          |         | (d) If applicable, explain how loss to follow-up was addressed                                                                                                                                    | N/A                              |
|                          |         | (e) Describe any sensitivity analyses                                                                                                                                                             | N/A                              |
| <b>Results</b>           |         |                                                                                                                                                                                                   |                                  |
| Participants             | 13*     | (a) Report numbers of individuals at each stage of study—eg numbers potentially eligible, examined for eligibility, confirmed eligible, included in the study, completing follow-up, and analysed | Results (P10–12)                 |
|                          |         | (b) Give reasons for non-participation at each stage                                                                                                                                              | N/A                              |

|                          |     |                                                                                                                                                                                                              |                                 |
|--------------------------|-----|--------------------------------------------------------------------------------------------------------------------------------------------------------------------------------------------------------------|---------------------------------|
|                          |     | (c) Consider use of a flow diagram                                                                                                                                                                           | N/A                             |
| Descriptive data         | 14* | (a) Give characteristics of study participants (eg demographic, clinical, social) and information on exposures and potential confounders                                                                     | Tables 1, 2<br>Results (P10-11) |
|                          |     | (b) Indicate number of participants with missing data for each variable of interest                                                                                                                          | N/A                             |
|                          |     | (c) Summarise follow-up time (eg, average and total amount)                                                                                                                                                  | N/A                             |
| Outcome data             | 15* | Report numbers of outcome events or summary measures over time                                                                                                                                               | Tables 3, 4                     |
| Main results             | 16  | (a) Give unadjusted estimates and, if applicable, confounder-adjusted estimates and their precision (eg, 95% confidence interval). Make clear which confounders were adjusted for and why they were included | Tables 3<br>Results (P12)       |
|                          |     | (b) Report category boundaries when continuous variables were categorized                                                                                                                                    | N/A                             |
|                          |     | (c) If relevant, consider translating estimates of relative risk into absolute risk for a meaningful time period                                                                                             | N/A                             |
| Other analyses           | 17  | Report other analyses done—eg analyses of subgroups and interactions, and sensitivity analyses                                                                                                               | Table 4<br>Results (P12-13)     |
| <b>Discussion</b>        |     |                                                                                                                                                                                                              |                                 |
| Key results              | 18  | Summarise key results with reference to study objectives                                                                                                                                                     | Discussion (P13)                |
| Limitations              | 19  | Discuss limitations of the study, taking into account sources of potential bias or imprecision. Discuss both direction and magnitude of any potential bias                                                   | Discussion (P16)                |
| Interpretation           | 20  | Give a cautious overall interpretation of results considering objectives, limitations, multiplicity of analyses, results from similar studies, and other relevant evidence                                   | Discussion (P13-16)             |
| Generalisability         | 21  | Discuss the generalisability (external validity) of the study results                                                                                                                                        | Discussion (P16)                |
| <b>Other information</b> |     |                                                                                                                                                                                                              |                                 |
| Funding                  | 22  | Give the source of funding and the role of the funders for the present study and, if applicable, for the original study on which the present article is based                                                | Funding information (P17)       |

\*Give information separately for exposed and unexposed groups.

**Note:** An Explanation and Elaboration article discusses each checklist item and gives methodological background and published examples of transparent reporting. The STROBE checklist is best used in conjunction with this article (freely available on the Web sites of PLoS Medicine at <http://www.plosmedicine.org/>, Annals of Internal Medicine at <http://www.annals.org/>, and Epidemiology at <http://www.epidem.com/>). Information on the STROBE Initiative is available at <http://www.strobe-statement.org>.
