# Supplementary material for: Direct and indirect costs of families with a child with acute lymphoblastic leukaemia in an academic hospital in China: a cross-sectional survey
Source: PubMed Central journal article supplement — BMJ Open. 2019 Jul 18;9(7):e030511. doi: 10.1136/bmjopen-2019-030511 (PMC6661580; doi:10.1136/bmjopen-2019-030511), 2019-07-18
Supplement: bmjopen-2019-030511supp001.pdf [file bmjopen-2019-030511supp001.pdf]

# Questionnaire on Family Financial Burden of Child with Acute Lymphoblastic Leukemia

## A、 Family Background Information

1. Your date of birth (solar calendar): \_\_\_\_\_. You are the child's (a) father (b) mother.
2. Your place of residence (province): \_\_\_\_\_, your current HuKou location: \_\_\_\_\_, your current Hukou status: (a) rural (b) urban
3. Date of birth of your spouse (solar calendar): \_\_\_\_\_, your spouse's place of residence (province): \_\_\_\_\_, your spouse's current Hukou location: \_\_\_\_\_, your spouse's current Hukou status: (a) rural (b) urban
4. Place of residence of your child (province): \_\_\_\_\_, your child's current Hukou location: \_\_\_\_\_, your child's current Hukou status: (a) rural (b) urban
5. Does your child live with his or her parents? (a) Yes (b) No
6. Prior to the child illness, your child's education level was :(a) not in school (b) in kindergarten (c) in primary school (d) in junior high school
7. Prior to the child illness, your family had a total of \_\_\_\_ people, including\_\_\_\_ people with income. After the child fell ill, did your family have new-born child? (a) Yes (b) No
8. Your education level: (a) no formal education (illiterate) (b) primary school or below (c) junior high school or below (d) the high school/technical school (e) college/university (f) master degree or above
9. Education level of your spouse: (a) no formal education (illiterate) (b) primary school or below (c) junior high school or below (d) the high school/technical school (e) college/university (f) master degree or above
10. Prior to the child illness, your average monthly income was \_\_\_\_\_RMB, your spouse's average monthly income was \_\_\_\_\_RMB, and your family's average

annual income was \_\_\_\_\_RMB.

11. Did you own your current residence prior to the child illness? (a) Yes (b) No
12. Did your family belong to low income family prior to the child illness? (a) Yes (b) No
13. Did you purchase social medical insurance for your child before his/her illness?  
(a) Yes (b) No  
If yes, the insurance purchased was: (a) Urban Resident Basic Medical Insurance  
(b) Children's Hospitalization Fund (c) New Rural Cooperative Medical Insurance (d) others  
If no, after the child fell ill, did you child enroll in social medical insurance? The enrolled social medical treatment insurance was \_\_\_\_\_(fill one list in Q13).
14. Did you receive medical assistance for your child after the child became ill?  
(a) Yes (b) No
15. Did you purchase commercial health insurance for your child before the child became ill? (a) Yes (b) No  
If yes, how many commercial health insurances you purchased for your child:  
(a)1 (b)2 (c) more than 2

## **B、 Family Financial Burden**

### **B.1 Direct Medical Costs**

1. The date of your child's diagnosis at the Children's Medical Center was \_\_\_\_\_,  
The completion date of the first three-phase treatment in the Children's Medical Center was \_\_\_\_\_
2. During the first three-phase treatment, the total medical costs paid to the Children's Medical Center were \_\_\_\_\_ RMB, to other medical institutions were \_\_\_\_\_RMB, including:
  - (a) medical insurance paid: \_\_\_\_\_ RMB, among them, the commercial medical insurance paid: \_\_\_\_\_ RMB.
  - (b) medical assistance (including funded by the Children's Medical

Center): \_\_\_\_\_ RMB.

3. During the first three-phase treatment, the costs that your family paid for purchasing the medicines from other medical institutions were about \_\_\_\_\_ RMB.

## **B.2 Direct Non-medical Costs**

4. During the treatment, your family's average monthly costs on food were \_\_\_\_\_ RMB. Compared with the costs before child's illness, the increased average monthly costs on food were \_\_\_\_\_ RMB.

5. Did your family purchase large electronic products (such as computer, video games, television, refrigerator, etc.) for your child during his or her treatment?  
(a) Yes (b) No

If yes, the costs were \_\_\_\_\_ RMB. Among them, computer: \_\_\_\_\_ RMB, video games: \_\_\_\_\_ RMB, television: \_\_\_\_\_ RMB, refrigerators: \_\_\_\_\_ RMB, others: \_\_\_\_\_ RMB.

6. Did your family buy toys for your child during the treatment? (a) Yes (b) No

If yes, the costs were \_\_\_\_\_ RMB. Compared with the costs before child illness, the new toy purchase expenses were \_\_\_\_\_ RMB.

7. Your family spent an average of \_\_\_\_\_ RMB on communications per month during the child's treatment. The increased average monthly communication fee was \_\_\_\_\_ RMB, compared with fee before child illness. If you registered for online service for your child, the total costs of the Internet were \_\_\_\_\_ RMB.

8. During the treatment of child, your average monthly costs on purchasing hygiene cleaning products and related materials were \_\_\_\_\_ RMB. The costs of purchasing auxiliary treatment facilities (e.g., ultraviolet disinfection lamp, air purifier, humidifier, etc.) were \_\_\_\_\_ RMB.

**[If you do not live in Shanghai, please answer question 9. If you live in Shanghai, please answer question 10.]**

9. If you do not live in Shanghai, what kind of transportation did you and your family usually take to and from the Children's Medical Center during your child's

treatment? (a) train (b) coach (c) plane (d) others \_\_\_\_\_

You and your family traveled to Children's Medical Center altogether \_\_\_ times.

The average costs per person on transportation were \_\_\_\_\_RMB. The total costs of transportation were\_\_\_\_\_RMB.

10. If you live in Shanghai, what kind of transportation did you and your family usually take to and from the Children's Medical Center during your child's treatment? (a) taxi (b) family car (c) others

On average, you and your family commuted from home to Children's Medical Center \_\_\_ times each month. Every time the transportation costs were\_\_\_\_\_RMB. The total costs of transportation were \_\_\_\_\_RMB. (If using family car, please estimate the costs of fuel, tolls and parking fees, *etc.*)

11. Did you rent an apartment near the hospital for the convenience of your family during your child's hospitalization? (a) Yes (b) No.

If yes, the agency fee was \_\_\_\_\_RMB. The average monthly rent was \_\_\_\_\_RMB. The average monthly payment for utility was \_\_\_\_\_RMB. You rent for a total of \_\_\_\_\_ months.

12. Did you hire a day laborer while your child was hospitalized? (a) Yes (b) No

If yes, you total hired\_\_\_\_\_ months. Day laborer worked\_\_\_\_\_ hours a day; hour salary was \_\_\_\_\_RMB; day laborer worked \_\_\_\_\_days per month.

### **B.3 Indirect Costs**

13. Before the child fell ill, what was the type of your work unit: (a) government agency (b) State-owned enterprises (including state-owned holding enterprises) (c) Private enterprise (d) Overseas-invested enterprises, foreign-funded enterprises or foreign-invested enterprises (e) public institution (f) Individual household or freelancer (g) farmer (h) Unemployed

**[If question 13 you chose (a)-(e), please answer question 14; If (f)-(h), please answer question 15.]**

14. What change did your employment situation have during your child's treatment?

(a) unchanged (b) discontinuation of work (c) short-term leave (d) long-term leave (including irregular leave) (e) others\_\_\_\_\_

If (c), the average monthly salary or work income decreased by\_\_\_\_\_%.

If (d), the length of absence from work was\_\_\_\_\_months. The average monthly salary or work income decreased by\_\_\_\_\_%

15. What change did your employment situation have during your child's treatment?

(a) unchanged (b) discontinuation of work (c) reduction of workload (d) others\_\_

If (b), you stop working altogether \_\_\_\_\_months, the average yearly income decreased by\_\_\_\_\_%.

If (c), due to the reduction of workload, the average yearly income decreased by\_\_\_\_\_%.

16. Before the child fell ill, what was the type of your spouse work unit: (a)

government agency (b) State-owned enterprises (including state-owned holding enterprises) (c) Private enterprise (d) Overseas-invested enterprises,

foreign-funded enterprises or foreign-invested enterprises (e) public institution (f)

Individual household or freelancer (g) farmer (h) Unemployed

**[If question 16 you chose (a)-(e), please answer question 17. If (f)-(h), please answer question 18.]**

17. What change did your spouse's employment situation have during your child's treatment? (a) unchanged (b) discontinuation of work (c) short-term leave (d) long-term leave (including irregular leave) (e) others

If (c), the average monthly salary or work income decreased by\_\_\_\_\_%.

If (d), the length of absence from work was\_\_\_\_\_months. The average monthly salary or work income decreased by\_\_\_\_\_%

18. What change did your spouse's employment situation have during your child's treatment?

(a) unchanged (b) discontinuation of work (c) reduction of workload (d) others

If (b), your spouse stop working altogether \_\_\_\_\_months, the average yearly income decreased by \_\_\_\_\_%.

If (c), due to the reduction of workload, the average yearly income decreased by \_\_\_\_\_%\_

19. During the first three-phase treatment, was there other relative besides you and your spouse caring for the child? (a) Yes (b) No

If yes, \_\_\_\_\_(who) cared for the child, he or she cared for \_\_\_\_ months. His or her work unit was \_\_\_\_\_ (no work, please fill “no”). The average monthly income loss for caring child was \_\_\_\_\_RMB.

20. During the first three-phase treatment, did you hire a full-time staff besides your family to accompany your child? (a) Yes (b) No.

If yes, she or he escorted for a total of \_\_\_\_\_ months, earning \_\_\_\_\_RMB.

21. During the first three-phase treatment, other large non-medical expenses that your family incurred for your child included \_\_\_\_\_. The average expenditure increased \_\_\_\_\_RMB per month.

#### **B.4 Other Information**

1. (Just ask parents with rural Hukou) Before you decided to go to Children’s Medical Center for treatment, were you and your spouse aware of the new policy announced by the National Ministry of Health in early 2011 concerning that children's leukemia would be reimbursed by the new rural cooperative medical system (NCMS) for 70%, and the Serious Disease Relief Fund would give 20% compensation according to the family situation? (a) Yes (b) No
2. In terms of medical expenses, reimbursement and concern and other aspects for children’s leukemia, do you have any suggestions or appeals to hospital, Health Administrative Department, Medical Insurance Department and other relevant government departments?  

---

---

3. If we still have questions regarding the questions in the questionnaire, or we want to know more about your family's financial burden and pressure in the future, can

we contact you directly for further inquiry? (1) Yes (2) No

Your mobile phone number: \_\_\_\_\_ Signature of parents: \_\_\_\_\_

\*\*\*\*\*

**The researcher's comprehensive evaluation of the quality of this questionnaire is:**

**(1) high (2) medium (3) low**

\*\*\*\*\*

Signature of interviewer: \_\_\_\_\_

Date of signature : \_\_\_\_\_
